14 **Abstract**

15 The hippocampus is critical for memory formation. Area CA2 has been shown to contribute to  
16 several essential brain functions including social novelty discrimination, sharp-wave ripple  
17 initiation and spatial encoding. The supramammillary nucleus (SuM) sends long-range  
18 projections to area CA2, is active during novelty exposure, and the SuM-CA2 connection has  
19 recently been shown to be important for social novelty discrimination. However, the properties  
20 and targets of the SuM input in CA2 are unknown. Using optogenetics, we found that  
21 stimulation of SuM axons elicited mixed excitatory and inhibitory responses in area CA2  
22 pyramidal neurons (PNs). We examined the strength of the SuM excitatory input to interneurons  
23 in area CA2 and identified parvalbumin-expressing basket cells as responsible for the  
24 feedforward inhibitory drive of SuM over area CA2. We demonstrated that inhibition recruited  
25 by the SuM input onto area CA2 PNs increased the precision of their action potential firing both  
26 in conditions of low and high cholinergic tone. Furthermore, we observed a clear modulation  
27 of CA1 activity with SuM stimulation in area CA2 in vivo and in slice, indicating that  
28 synchronized CA2 output drives a pulsed inhibition in area CA1. Hence, the network revealed  
29 here lays basis for understanding how SuM activity directly acts on the local hippocampal  
30 circuit to allow social memory encoding.

31

## 32 **Introduction**

33 The hippocampus is critical for memory formation and spatial navigation (Buzsáki and Moser,  
34 2013; Eichenbaum and Cohen, 2014), yet basic questions persist regarding the circuitry and  
35 cellular components allowing these processes. While area CA2 has been shown to play a  
36 significant role in several hippocampal processes including social memory formation (Hitti and  
37 Siegelbaum, 2014; Stevenson and Caldwell, 2014) sharp-wave ripple generation (Oliva et al.,  
38 2016) and spatial encoding (Kay et al., 2016), information about the local circuitry and cellular  
39 processes allowing these functions is lacking. There is mounting evidence that generalizations  
40 cannot be made from the rich understanding of areas CA1 and CA3, as neurons in area CA2  
41 have been shown to have unique molecular expression profiles (Cembrowski et al., 2016; Lein  
42 et al., 2004), morphology (Bartesaghi and Ravasi, 1999; No, 1934) and cellular properties  
43 (Robert et al., 2020; Srinivas et al., 2017; Sun et al., 2014). Notably, and in contrast to area  
44 CA1, CA2 pyramidal neurons do not undergo NMDA-mediated synaptic plasticity (Dasgupta  
45 et al., 2020; Zhao et al., 2007). Rather, the excitability of this region is tightly controlled by a  
46 highly plastic network of inhibitory neurons (Leroy et al., 2017; Nasrallah et al., 2015;  
47 Piskorowski and Chevaleyre, 2013). When active, CA2 pyramidal neurons (PNs) can strongly  
48 drive area CA1 (Chevaleyre and Siegelbaum, 2010; Kohara et al., 2014; Nasrallah et al., 2019),  
49 thereby influencing hippocampal output. Furthermore, CA2 neurons also project to area CA3,  
50 where they recruit inhibition (Boehringer et al., 2017; Kohara et al., 2014) and act to control  
51 hippocampal excitability. Thus, CA2 neurons are poised to have long-reaching effects in the  
52 hippocampus, and a better understanding of the regulation of this region is needed.

53 The hypothalamic supramammillary (SuM) nucleus sends projections to both area CA2 and the  
54 dentate gyrus (Haglund et al., 1984; Vertes, 1992). These long-range connections have been  
55 shown in several species including rodents, primates and humans (Berger et al., 2001; Haglund  
56 et al., 1984; Wyss et al., 1979) where they are present in early hippocampal development. The  
57 SuM has been found to be active during a wide variety of conditions including novel  
58 environment exposure (Ito et al., 2009), reinforcement learning (Ikemoto, 2005; Ikemoto et al.,  
59 2004), food anticipation (May et al., 2019), and during REM sleep and arousal (Pedersen et al.,  
60 2017; Renouard et al., 2015). This nucleus is also known for participating in hippocampal theta  
61 rhythm (Pan and McNaughton, 2002, 1997), possibly by its direct projection to the  
62 hippocampus or by modulation of the medial septum (Borhegyi et al., 1998; Vertes and Kocsis,  
63 1997) and regulating spike-timing between hippocampus and the cortex (Ito et al., 2018).  
64 Disruption of SuM neuron activity with pharmacological methods (Aranda et al., 2008; Shahidi

65 et al., 2004) or lesions (Aranda et al., 2006) has been reported to disrupt hippocampal memory.  
66 Serotonin depletion of the SuM leads to deficiencies in spatial learning in the Morris water  
67 maze, and results in altered hippocampal theta activity (Gutiérrez-Guzmán et al., 2012;  
68 Hernández-Pérez et al., 2015). Salient rewarding experiences also activate the SuM, as  
69 evidenced by cFos expression in monoaminergic SuM neurons by consumption of rewarding  
70 food (Plaisier et al., 2020). Furthermore, the rewarding aspects of social aggression have been  
71 shown to involve an excitatory circuit between the hypothalamic ventral premammillary  
72 nucleus and the SuM (Stagkourakis et al., 2018). It has recently been shown that there are two  
73 separate populations of cells in the SuM that target either CA2 or the DG (Chen et al., 2020).  
74 In the DG, the SuM terminals release both glutamate and GABA (Boulland et al., 2009;  
75 Hashimoto et al., 2018; Pedersen et al., 2017; Soussi et al., 2010). The SuM-DG projection  
76 has been recently shown to play a role in modulating DG activity in response to contextual  
77 novelty (Chen et al., 2020) and spatial memory retrieval (Li et al., 2020). In contrast, functional  
78 studies of the SuM-CA2 projection have found that this connection is entirely glutamatergic  
79 (Chen et al., 2020). It was recently discovered that the CA2-projecting SuM neurons are active  
80 during social novelty exposure, and their selective stimulation prevents expression of a memory  
81 of a familiar conspecific (Chen et al., 2020). These findings strongly suggest that the SuM-CA2  
82 connection conveys a social novelty signal to the hippocampus. Furthermore, recent *in vivo*  
83 recordings from the SuM in anaesthetized rats recently reported that a subset of SuM neurons  
84 were active earlier than CA2 and other hippocampal cells during SWR (Vicente et al., 2020),  
85 indicating a possible role for the SuM-CA2 projection in shaping area CA2 activity prior to  
86 SWR onset.

87 Even with the anatomical and *in vivo* data, the properties and consequences of SuM activation  
88 on area CA2 activity remain unexplored. In this study, we use a combination of approaches to  
89 specifically examine the effects of SuM input stimulation on neuronal activity in hippocampal  
90 area CA2. Here, we show that the SuM-evoked post-synaptic excitation of CA2 PN is controlled  
91 by SuM-driven inhibition. We identified PV-expressing basket cells as the neuronal population  
92 most strongly excited by SuM input in area CA2, and thus likely responsible for the feedforward  
93 inhibition evoked by SuM in CA2 PNs. We found that recruitment of this inhibition enhances  
94 the precision of AP firing by area CA2 PNs in conditions of low and high cholinergic tone.  
95 Finally, we observed that the resulting synchronized CA2 PN activity drives inhibition in area  
96 CA1, thereby providing a circuit mechanism through which SuM can modulate hippocampal  
97 excitability by controlling area CA2 output.

98

## 99 **Results**

100 In order to functionally investigate the SuM projection to area CA2, we used an anterograde  
101 strategy in two separate transgenic mouse lines (Figure 1A and Supplemental Figure 1F). It has  
102 been shown that the source of vesicular glutamate transporter 2 (VGluT2)-immunopositive  
103 boutons in area CA2 originate from the SuM (Halasy et al., 2004). To further assess where these  
104 VGluT2-expressing SuM cells project into the hippocampus, we injected an AAV to express  
105 channelrhodopsin(H143R)-YFP (ChR2-EYFP) under the control of Cre into the SuM of a  
106 transgenic mouse line with Cre expression controlled by the VGluT2 promoter, the Tg(Slc17ab-  
107 icre)10Ki line (Borgius et al., 2010) (Supplemental Figure 1F). In parallel, we used a novel  
108 mouse line, the Csf2rb2-Cre line that selectively expresses Cre in the SuM (Chen et al., 2020)  
109 (Figure 1A). To find the optimal injection site, we injected a retrograde canine adenovirus type  
110 2 (CAV-2) into area CA2 of the hippocampus to permit the expression of Cre-recombinase  
111 (Cre) in hippocampal-projecting SuM neurons, and an adeno-associated virus (AAV) was  
112 injected into the SuM to allow the expression of EGFP under the control of Cre (Supplemental  
113 Figure 1A). In 5 animals the injection of retrograde CAV-2 was sufficiently targeted to area  
114 CA2, as indicated by the presence of EGFP-expressing SuM axonal fibers primarily in this  
115 hippocampal area (Supplemental Figure 1B). We stained for calretinin to define the boundaries  
116 of the SuM nucleus (Pan and McNaughton, 2004). Consistent with what has been described  
117 (Chen et al., 2020), we observed that CA2-projecting cells co-express calretinin and are located  
118 in the medial SuM (Supplemental figure 1C-D). These cells were located bilaterally, ventral to  
119 the fiber bundles that traverse the SuM (Supplemental Figure 1C).

120 We found that with both transgenic mouse lines we could reproducibly restrict expression of  
121 ChR2-EYFP in the SuM and avoid infecting nearby hypothalamic regions that also may project  
122 to the hippocampus (Figure 1A, Supplemental Figure 1F). For all experiments, injection sites  
123 were examined post hoc to ensure correct targeting of the SuM. With both lines of transgenic  
124 mice, we observed identical patterns of SuM fiber localization in the hippocampus. EYFP-  
125 containing SuM axons were found throughout the supragranular layer of the DG and in area  
126 CA2 (Figure 1B) where they clustered around the pyramidal layer (stratum pyramidale, SP) and  
127 spread in stratum oriens (SO). The SuM fiber projection area was clearly restricted to area CA2,  
128 as defined by expression of the CA2-specific markers PCP4 and RGS14 and did not spread to  
129 neighboring areas CA3 and CA1 (Figure 1B). In order to maximize the precision of our

130 experiments, we frequently only achieved partial infection of the SuM, as indicated by the  
131 sparseness of Chr2-EYFP-containing fibers in comparison to the number of vGluT2-stained  
132 boutons in this region (Supplemental Figure 1G-H).

133 SuM axons provide excitatory glutamatergic input to pyramidal neurons in area CA2 and CA3a

134 In order to better understand the cellular targets and consequences of SuM input activity in area  
135 CA2, we applied the above experimental strategy to express Chr2-EYFP in SuM axonal fibers  
136 and performed whole-cell current and voltage clamp recordings of PNs across the hippocampal  
137 CA regions and activated projecting axons with pulses of 488 nm light in acute hippocampal  
138 slices. Following all recordings, we performed post-hoc anatomical reconstructions of recorded  
139 cells and axonal fibers, as well as immunohistochemical staining for CA2-area markers.

140 We observed that photostimulation of SuM axons elicited excitatory post-synaptic responses in  
141 63 % of PNs (n = 166 of 263 cells) located in area CA2. PNs in this region shared similar overall  
142 dendritic morphologies and electrophysiological properties (Table 1) but differed along two  
143 criteria. First, in *stratum lucidum* some PNs clearly had thorny excrescences (TE) while others  
144 had very smooth apical dendrites (Figure 1C-D). Based on the presence of TEs, we classified  
145 cells as CA2 or CA3 PNs (unequivocal distinction was possible for 148 neurons). Second, the  
146 distribution locations of PN soma along the radial axis of the hippocampus allowed us to cluster  
147 them as deep (closer to *stratum oriens*, SO) or superficial (closer to *stratum radiatum*, SR)  
148 subpopulations (unequivocal distinction was possible for 157 neurons). We found that the SuM-  
149 PN connectivity was not different between CA2 and CA3 PNs (Table 2,  $\chi^2$  test for CA2 and  
150 CA3 PNs,  $p = 0.572$ ) or between deep and superficial PNs (Table 2,  $\chi^2$  test for deep and  
151 superficial PNs,  $p = 0.946$ ). Light-evoked excitatory post-synaptic potentials (EPSPs) and  
152 excitatory post-synaptic currents (EPSCs) recorded at -70mV were of fairly small amplitude  
153 (Figure 1C and 1D) that were similar regardless of the PN type or somatic location (Table 2,  
154 Mann-Whitney U test for CA2 and CA3 PNs,  $p = 0.409$ ; Mann-Whitney U test for deep and  
155 superficial PNs,  $p = 0.306$ ). Because no significant differences in post-synaptic responses to  
156 SuM input stimulation were observed between CA2 and CA3 PNs as well as between deep and  
157 superficial PNs, data from all PNs was pooled for the rest of the study. The small amplitude of  
158 SuM input-evoked post-synaptic responses in PNs was not due to under-stimulation of SuM  
159 axons as EPSC amplitudes rapidly reached a plateau when increasing light intensity  
160 (Supplemental Figure 2). We are confident that this transmission is due to action potential-  
161 generated vesicle release because all transmission was blocked following application of  
162 tetrodotoxin (TTX) (Supplemental Figure 2). The pure glutamatergic nature of the SuM input

163 was confirmed by the complete block of light-evoked synaptic transmission following the  
164 application of NBQX and D-APV (Supplemental Figure 2; amplitudes were  $16 \pm 4.8$  pA in  
165 control and  $1.8 \pm 0.3$  pA in NBQX & D-APV,  $n = 6$ ; Wilcoxon signed-rank test,  $p = 0.03$ ).  
166 These data confirm that SuM inputs provide long-range glutamatergic excitation to CA2 and  
167 CA3 PNs in area CA2.

#### 168 PNs in area CA2 receive mixed excitatory and inhibitory responses from SuM input

169 Photostimulation of SuM input elicited excitatory post-synaptic potentials (EPSPs) of fairly  
170 small amplitude in area CA2 PNs held at  $-70$  mV (Figure 1E and 1F). Because current clamp  
171 experiments also show that SuM stimulation input also recruits feedforward inhibition in area  
172 CA2 (Figure 1 C4 and D4), we asked if the amplitude of SuM input stimulation-evoked EPSPs  
173 in PNs could be controlled by inhibition. Interestingly, blocking inhibitory transmission with  
174 the GABA<sub>A</sub> and GABA<sub>B</sub> receptor antagonists SR95531 and CGP55845A led to a significant  
175 increase of light-evoked EPSP amplitude recorded in area CA2 PNs (Figure 1F and 1G;  
176 amplitudes of the first response were  $0.18 \pm 0.05$  mV in control and  $0.24 \pm 0.05$  mV in SR95531  
177 & CGP55845A,  $n = 14$ ; Wilcoxon signed-rank tests,  $p = 0.004$  for the first PSP,  $p = 0.013$  for  
178 the second PSP,  $p < 0.001$  for the third PSP). Thus, this result demonstrates a negative control  
179 of SuM-driven excitation by feedforward inhibition.

#### 180 Basket cells are strongly recruited by SuM inputs

181 Because the hippocampus hosts a variety of interneurons (INs) that are involved in controlling  
182 specific aspects of PN excitability, we wished to establish which kind of IN was targeted by the  
183 SuM input to area CA2. We performed whole-cell recordings from INs in this area and assessed  
184 post-synaptic excitatory responses to SuM axons stimulation in these cells (Figure 2). In  
185 contrast with previous reports of an exclusive innervation of PNs by SuM (Maglóczy et al.,  
186 1994), we observed robust light-evoked excitatory transmission from SuM axons in 35 out of  
187 62 interneurons (INs) with soma located in SP. Following anatomical biocytin-streptavidin  
188 staining and reconstructions of recorded INs (allowing unequivocal identification in 48  
189 neurons), we were able to classify INs based on their physiological properties, somatic location  
190 and axonal arborization location. We classified 22 cells as basket cells (BCs) because their  
191 axonal arborizations were restricted to SP (Figure 2A). BCs fired APs at high frequency either  
192 in bursts or continuously upon depolarizing current injection and showed substantial  
193 repolarizing sag current when hyperpolarized (Table 3). Light-evoked EPSCs and EPSPs were  
194 readily observed in the vast majority of BCs (Figure 2A and C, Table 4) and reached large  
195 amplitudes in some instances. An additional 26 INs with soma in SP were classified as non-



196 BCs because their axon did not target SP (Figure 2B). In our recordings, these cells fired in  
197 bursts and showed little sag during hyperpolarizing current injection steps (Table 3). We  
198 consistently observed no or very minor light-evoked excitatory transmission onto non-BCs  
199 (Figure 2C, Table 4). Furthermore, we recorded from 17 INs that had soma in stratum oriens  
200 (SO) and 9 in stratum radiatum (SR). Like non-BCs, these INs did not receive strong excitation  
201 from SuM fibers (Table 4). This data is consistent with the conclusion that SuM input  
202 preferentially forms excitatory synapses onto basket cells in area CA2.

203 To fully assess the strength of SuM inputs onto the different cell types, we examined the  
204 following parameters for each population: the connectivity, success rate, amplitude, potency,  
205 kinetics, and latencies of EPSCs as well as the resulting depolarization of the membrane  
206 potential. First, SuM inputs preferentially innervated BCs as evidenced by a higher connectivity  
207 of EPSCs in BCs than in PNs or other INs (Table 4). Importantly, excitatory responses had  
208 short latencies with limited jitter (Table 4) indicating that the connection was monosynaptic in  
209 all cell types. When voltage-clamping cells at -70 mV, light-evoked EPSCs could be compared  
210 between different cell populations. However, not every photostimulation gave rise to an EPSC  
211 leading to an average success rate that tended to be highest in BCs (Table 4). In addition, BCs  
212 appeared to receive more excitation from SuM inputs than other cells types, as the amplitude  
213 of EPSCs were larger in BCs than in PNs (Table 4). EPSCs recorded in BCs also had faster  
214 kinetics than in PNs (Table 4). Interestingly, combining the success rate of EPSCs with their  
215 respective amplitudes to compute the potency of the SuM synapses revealed that it was  
216 significantly larger in BCs than in PNs and non-BCs (Figure 2C; potencies were  $12 \pm 1.6$  pA  
217 for PNs,  $n = 166$ ;  $29 \pm 7.8$  pA for BCs,  $n = 18$ ;  $5.9 \pm 1.5$  pA for non-BCs,  $n = 13$ ; Kruskal-  
218 Wallis test with Dunn-Holland-Wolfe post hoc test,  $p = 0.022$ ). Consequently, EPSPs recorded  
219 at -70 mV were of larger amplitude in BCs than in PNs and non-BCs (Figure 2D; amplitudes  
220 were  $0.44 \pm 0.06$  mV for PNs,  $n = 20$ ;  $1.71 \pm 0.57$  mV for BCs,  $n = 10$ ;  $0.53 \pm 0.07$  mV for non-  
221 BCs,  $n = 4$ ; Kruskal-Wallis test with Dunn-Holland-Wolfe post hoc test,  $p < 0.001$ ). When  
222 recording cell-attached or current-clamping BCs at their resting membrane potential ( $V_M$ ),  
223 photostimulation of SuM axons was able to evoke AP firing (Figure 2E) in multiple instances  
224 ( $n = 7$  of 13), this was never observed in PNs ( $n = 0$  of 78), non-BCs ( $n = 0$  of 16), SR INs ( $n$   
225  $= 0$  of 9) or SO INs ( $n = 0$  of 8). These results show that SuM projections to area CA2  
226 preferentially provide excitation to BCs that are likely responsible of the feedforward inhibition  
227 observed in PNs. This is in accordance with an efficient control of area CA2 PNs excitation by



228 the SuM inhibitory drive as axons from BCs deliver the feedforward inhibition to the peri-  
229 somatic region of PNs.

### 230 Parvalbumin-expressing basket cells mediate the feedforward inhibition recruited by SuM

231 In the hippocampus, BCs express either cholecystinin (CCK) or parvalbumin (PV)  
232 (Klausberger and Somogyi, 2008). We found that in response to a 1 second depolarizing pulse,  
233 most BCs that received strong SuM excitatory input displayed very fast AP firing with little  
234 accommodation in the AP firing frequency (Table 3, Figure 3A and B). This firing behavior is  
235 similar to what has been reported for fast spiking PV-expressing BCs in CA1 (Pawelzik et al.,  
236 2002). In contrast, CCK-expressing BCs show a lower firing frequency and more  
237 accommodation during the train (Pawelzik et al., 2002). This result suggests that BCs connected  
238 by the SuM may be expressing PV. To directly confirm this hypothesis, we performed post-hoc  
239 immunostaining of recorded interneurons that received strong excitation from SuM input.  
240 Because of the dialysis inherent to the whole-cell recording conditions, we encountered  
241 difficulty staining for multiple cells. However, PV-immunoreactivity could unequivocally be  
242 detected in either the soma or dendrites of 7 connected BCs (Figure 3C). Therefore, this data  
243 demonstrates that at least a fraction of the recorded BCs connected by the SuM are expressing  
244 PV.

245 Hence, to address whether the lack of PV staining in some cells was a consequence of dialysis  
246 or resulted from the fact that non-PV BC are also connected, we made use of a different strategy  
247 to differentiate PV and CCK INs. It has previously been demonstrated that PV+ BC  
248 transmission can be strongly attenuated by mu opioid receptor activation (MOR) while CCK+  
249 BC transmission is insensitive to MOR activation (Glickfeld et al., 2008). Thus, in order to  
250 determine if SuM inputs preferentially target one subpopulation of BCs, we recorded from PNs  
251 in area CA2 and examined the sensitivity of light-evoked IPSCs to the application of the MOR  
252 agonist DAMGO (Figure 4A). We found that there was a near complete block of the light-  
253 evoked IPSC amplitude following 1  $\mu$ M DAMGO application (Figure 4A; IPSC amplitudes  
254 were  $343 \pm 123$  pA in control and  $31 \pm 12.4$  pA in DAMGO hence a  $88 \pm 5.0$  % block by  
255 DAMGO, n = 6 PNs; Wilcoxon signed-rank test, p = 0.031), while direct excitatory  
256 transmission remained unaffected (Figure 4A; EPSC amplitudes were  $6.7 \pm 1.1$  pA in SR95531  
257 & CGP55845A and  $5.6 \pm 0.9$  pA after DAMGO, n = 17 PNs; Wilcoxon signed-rank test, p =  
258 0.19).

259 Because a fraction of PV+ INs in area CA2 is also the substrate of an iLTD of feedforward  
260 inhibition from CA3 mediated by delta opioid receptor (DOR) activation, we sought to further  
261 refine our characterization of the SuM feedforward inhibition by assessing its sensitivity to  
262 DOR activation. Application of 0.5  $\mu$ M of the DOR agonist DPDPE led to a long-term reduction  
263 of light-evoked IPSCs recorded in area CA2 PNs, similar to the iLTD seen by CA3 input  
264 stimulation (Figure 4B; amplitudes were  $168 \pm 28$  pA in control and  $64 \pm 22$  pA in DPDPE  
265 hence a  $61 \pm 14$  % block by DPDPE,  $n = 7$ ; paired-T test,  $p = 0.015$ ), while leaving direct  
266 EPSCs unaffected (Figure 4B; amplitudes were  $4.0 \pm 1.6$  pA in SR95531 & CGP55845A and  
267  $3.1 \pm 1.1$  pA after DPDPE,  $n = 7$ ; Wilcoxon signed-rank test,  $p = 0.22$ ). Further confirming the  
268 PV+ nature of INs responsible for the SuM feedforward inhibition, this result reveals that both  
269 the local CA3 and long-range SuM inputs converge onto the same population of INs to inhibit  
270 area CA2 PNs, thus enabling cross-talk between these routes through synaptic plasticity of PV+  
271 INs.

272 Following up on this observation, we wished to genetically confirm that PV+ INs are  
273 responsible for the SuM feedforward inhibition over area CA2 PNs. As the dichotomy between  
274 PV+ versus CCK+ INs sensitivity to opioids has not been directly verified in area CA2, we  
275 used inhibitory DREADD to selectively inhibit PV+ INs in area CA2 while monitoring  
276 feedforward IPSCs from area CA2 PNs in response to SuM stimulation. To achieve that, we  
277 injected AAVs expressing a Cre-dependent h4MDi inhibitory DREADD in area CA2 of PV-  
278 Cre mice together with AAVs expressing Chr2 with a pan-neuronal promoter in the SuM  
279 (Figure 4C). We observed a substantial reduction of SuM-evoked IPSC amplitude recorded in  
280 area CA2 PNs upon application of 10  $\mu$ M of the DREADD ligand CNO (Figure 4D; amplitudes  
281 were  $847 \pm 122$  pA in control and  $498 \pm 87$  pA in CNO hence a  $42 \pm 6.0$  % block by CNO,  $n =$   
282  $13$ ; paired-T test,  $p < 0.001$ ). Although we never measured a complete block of inhibitory  
283 responses, this result unequivocally places PV+ INs as mediators of the SuM feedforward  
284 inhibition of area CA2 PNs. The incomplete block of IPSCs in these experiments could be a  
285 consequence of partial infection of PV+ INs in area CA2 by AAVs carrying DREADDs (Figure  
286 4E; fraction of PV+ INs expressing DREADDs in CA2 =  $75 \pm 3.5$  %,  $n = 13$ ) and partial  
287 silencing of DREADD-expressing PV+ INs by CNO. Altogether, these combined results  
288 strongly indicate that SuM axons are efficiently and selectively exciting PV+ BCs in area CA2,  
289 thus driving a feedforward inhibition onto neighboring PNs.

290 The feedforward inhibitory drive from SuM controls pyramidal neurons excitability

291 Given SuM axonal stimulation triggers an excitatory-inhibitory sequence in post-synaptic PNs,  
292 we asked which effect would prevail on PN excitability. In order to assess this, we mimicked  
293 an active state in PNs by injecting constant depolarizing current steps sufficient to sustain AP  
294 firing during 1 second while photostimulating SuM axons at 10 Hz (Figure 5A and 5B). We  
295 observed that recruitment of SuM inputs significantly delayed the onset of the first AP (Figure  
296 5C; latency to the first AP were  $221 \pm 19.9$  ms in control and  $233 \pm 19.1$  ms with  
297 photostimulation, hence a  $12.1 \pm 4.3$  ms increase upon photostimulation,  $n = 12$ ; paired-T test,  
298  $p = 0.016$ ). In addition, given SuM neurons display theta-locked firing *in vivo*, we asked if  
299 rhythmic inhibition driven by SuM inputs in area CA2 could pace AP firing in PNs by defining  
300 windows of excitability. Indeed, photostimulation of SuM axons at 10 Hz led to a significant  
301 decrease of variability in the timing of AP firing by PNs (Figure 5D and 5E; standard deviations  
302 of the first AP timing were  $36.9 \pm 11$  ms in control and  $24.7 \pm 7.4$  ms with photostimulation,  
303 hence a  $12.3 \pm 5.3$  ms decrease upon photostimulation,  $n = 12$ ; Wilcoxon signed-rank tests,  $p <$   
304  $0.001$  for the first AP,  $p = 0.008$  for the second AP,  $p = 0.004$  for the third AP). Both the delay  
305 of AP onset and the reduction of AP jitter stemmed from the feedforward inhibition recruited  
306 by SuM inputs as application of GABA<sub>A</sub> and GABA<sub>B</sub> receptor antagonists abolished these  
307 effects of SuM stimulation (Figure 5C-E; latency to the first AP were  $232 \pm 19.8$  ms in SR95531  
308 & CGP55845A and  $235 \pm 18.0$  ms with photostimulation,  $n = 6$ ; Wilcoxon signed-rank test,  $p$   
309  $= 0.44$ ; standard deviations of the first AP timing were  $11.9 \pm 2.0$  ms in SR95531 &  
310 CGP55845A and  $7.1 \pm 1.5$  ms with photostimulation,  $n = 6$ ; Wilcoxon signed-rank tests,  $p =$   
311  $0.22$  for the first AP,  $p = 0.16$  for the second AP,  $p = 0.09$  for the third AP). These results reveal  
312 that the purely glutamatergic SuM input, by recruiting feedforward inhibition, has an overall  
313 inhibitory effect on PN excitability and can influence the timing and jitter of area CA2 PN  
314 action potential firing.

315 It has been reported that the AP discharge of SuM neurons *in vivo* is phase-locked to the  
316 hippocampal theta rhythm (Kocsis and Vertes, 1994). Because theta rhythm is a brain state  
317 characterized by elevated levels of acetylcholine, we approximately mimicked these conditions  
318 in the hippocampal slice preparation by bath application of  $10 \mu\text{M}$  of the cholinergic agonist  
319 carbachol (CCh). Under these conditions, CA2 PNs depolarize and spontaneously fire rhythmic  
320 bursts of APs, and the properties of these AP bursts are tightly controlled by excitatory and  
321 inhibitory synaptic transmission (Robert et al., 2020). Of note, we observed that CCh  
322 application depressed the SuM-CA2 excitatory and inhibitory drive and decreased short-term  
323 depression at these synapses (Supplemental Figure 3). Under these conditions, we asked how

324 this spontaneous AP bursting activity would be affected by activation of the SuM input by  
325 triggering 10 second-long trains of 0.5 ms light pulses delivered at 10 Hz to stimulate SuM  
326 axons at the onset of bursts (Figure 6A). Because of the intrinsic cell-to-cell variability of  
327 bursting kinetics, we photo-stimulated SuM inputs only during interleaved bursts in the same  
328 cells. To do this, bursts were detected automatically with an online threshold detection system  
329 that started the photostimulation pulse train after the first AP of every alternating burst, starting  
330 with the second burst (Figure 6A and B). For analysis, the number of APs and bursting kinetics  
331 could be compared within the same cell. We observed a significant decrease in the number of  
332 APs fired during a burst when SuM inputs were photo-stimulated as compared to interleaved  
333 control bursts (Figure 6C and 6D; numbers of APs per burst were  $15.2 \pm 2.3$  in control and  $6.9$   
334  $\pm 1.3$  with photostimulation,  $n = 7$ ; paired-T test,  $p = 0.031$ ). In control bursts, the AP firing  
335 rate of CA2 PNs initially increases, and then progressively decreases. In the photo-stimulation  
336 bursts, the initial increase of AP firing frequency was absent, and the subsequent AP firing  
337 frequency was reduced (Figure 6E; 2-way ANOVA on firing rate over time in light-on vs light-  
338 off conditions; light factor,  $p < 0.001$ ; time factor,  $p < 0.001$ ; light x time factor,  $p = 0.052$ ).

339 In the presence of CCh, spontaneous AP bursting is preceded by a membrane depolarization.  
340 Following several seconds of AP firing, the membrane potential of CA2 PNs remains  
341 depolarized for several seconds, and slowly hyperpolarizes until the next burst event. We  
342 observed that photo-stimulation of SuM inputs resulted in a striking reduction in the amount of  
343 time the membrane potential remained depolarized, and this is likely why the burst duration  
344 was significantly shorter in bursts with SuM photo-stimulation (Figure 6F and G; burst duration  
345 was  $4.0 \pm 1.1$  s in control and  $1.6 \pm 0.5$  s with photostimulation,  $n = 7$ ; paired-T test,  $p = 0.037$ ).  
346 The rate and level of  $V_M$  repolarization following bursts were not significantly changed by SuM  
347 input photostimulation ( $V_M$  repolarization rate was  $-3.3 \pm 0.6$  mV/s in control and  $-3.6 \pm 0.7$   
348 mV/s with photostimulation,  $n = 7$ ; paired-T test,  $p = 0.601$ ; post-burst  $V_M$  was  $-62.8 \pm 1.7$  mV  
349 in control and  $-62.0 \pm 2.0$  mV with photostimulation,  $n = 7$ ; paired-T test,  $p = 0.173$ ), however  
350 the inter-burst time interval was reduced. Indeed, AP bursts with SuM input activation were  
351 followed more rapidly by another burst of AP than the ones without SuM input activation  
352 (Figure 6B, H; time until next burst was  $93 \pm 14$  s in control and  $59 \pm 17$  s with photostimulation,  
353  $n = 7$ ; paired-T test,  $p = 0.001$ ), which could be due to both short-term depression of inhibitory  
354 transmission after repeated activation during the SuM input photostimulation train and reduced  
355 activation of hyperpolarizing conductances during bursts shortened by SuM input

356 photostimulation. Thus, in our preparation, SuM input activation is able to modify the  
357 spontaneous bursting activity of CA2 PNs under conditions of high cholinergic tone.

358 As SuM input controls burst firing of action potentials and likely paces activity in area CA2,  
359 we wondered how the subsequent output of CA2 PNs would affect their post-synaptic targets.  
360 Because CA2 PNs strongly project to CA1 PNs, this activity is likely to influence CA1 encoding  
361 and hippocampal output. Thus, we examined the consequences of SuM-CA2 input stimulation  
362 on area CA1 both in vivo and in acute slices treated with CCh to induce spontaneous activity  
363 (Figure 7).

364 ChR2-EYFP was expressed in the SuM of *Csf2rb2-cre* mice in a cre-dependent manner and the  
365 mice were implanted with a microdrive targeting tetrodes to region CA1 and an optical fiber to  
366 the SuM terminals in CA2 (Figure 7A). Mice were placed in a small box (familiar context) and  
367 left free to explore as blue (473 nm) laser light pulses (50 ms pulse width) were applied to the  
368 SuM terminals at 10 Hz. Across 23 recording sessions in five mice we found that the activation  
369 of SuM terminals in CA2 resulted in a significant and reproducible change in the multiunit  
370 spiking activity recorded in the pyramidal cell layer of CA1 on 34 of 55 tetrodes. The firing  
371 rate change was similar across individual tetrodes (Figure 7B and C), with a decrease in the  
372 normalized firing rate starting shortly after laser onset and continuing for about 10 ms, followed  
373 immediately by a rebound-like increase to about 20 % greater than baseline firing rate (Figure  
374 7B and C).

375 In order to get a better mechanistic understanding of this observation, we set out to decipher  
376 how SuM activity in area CA2 influences CA1 in the hippocampal slice preparation. To this  
377 end, we used the same photostimulation protocol used in vivo that consisted of light stimulation  
378 trains of 50 ms-long pulses delivered at 10 Hz for 1 second, repeated every 10 seconds for 2  
379 minutes and interleaved with light-off sweeps of the same duration, with the microscope  
380 objective centered on area CA2. Whole-cell patch-clamp recordings of CA1 PNs were obtained  
381 in acute hippocampal slices superfused with CCh and subjected to this light stimulation protocol  
382 (Figure 7D). We asked what synaptic events may be responsible for the decreased firing of CA1  
383 units observed 10 – 20 ms after light onset in vivo (Figure 7A-C). Whole-cell recordings of  
384 CA1 PNs showed an absence of EPSCs time-locked to the photostimulation in all but one case  
385 ( $n = 11/12$ ) (Figure 7E and F). In contrast, we often ( $n = 7/12$ ) observed light-evoked IPSCs in  
386 CA1 PNs occurring 10 – 20 ms after light onset (Figure 7G and H). Therefore, the reduction in  
387 firing of CA1 units in vivo is likely caused by increased inhibitory inputs onto CA1 PNs within  
388 10 – 20 ms of SuM fiber stimulation over area CA2. This result highlights a contribution of

389 SuM input to controlling CA2 output that regulate CA1 activity in vivo and provides a  
390 mechanistic interpretation of this observation at the circuit level.

391

## 392 **Discussion**

393 In this study, we provide direct evidence for a functional connection between the hypothalamus  
394 and the hippocampus. Using stereotaxic injection of viral vectors in combination with  
395 transgenic mouse lines to express channelrhodopsin in a projection-specific manner, we have  
396 been able to selectively stimulate SuM axons in area CA2 of the hippocampus, allowing for the  
397 direct examination of synaptic transmission. This approach yielded novel functional  
398 physiological information about the SuM post-synaptic targets and overall consequences of  
399 activation. We found that, in contrast to previous anatomical reports, SuM inputs form synapses  
400 onto both PNs and INs in area CA2. The excitatory drive evoked by light-stimulation of SuM  
401 inputs was significantly larger for BC INs, which we demonstrate are likely PV+. The resulting  
402 feedforward inhibition recruited by SuM input stimulation enhanced the precision of AP timing  
403 of CA2 PNs in conditions of low and high cholinergic tone. The modified CA2 output evoked  
404 poly-synaptic inhibition in area CA1, likely responsible for a decrease firing rate of CA1 units  
405 in vivo. Overall, we demonstrate that SuM input controls CA2 output to area CA1 by recruiting  
406 feedforward inhibition.

### 407 SuM inputs to area CA2 form a microcircuit where PV+ basket cells strongly inhibit pyramidal 408 neurons

409 Glutamatergic innervation of area CA2 by the SuM has been previously described by tracing  
410 studies (Kiss et al., 2000; Soussi et al., 2010) and presumed to form synapses exclusively onto  
411 PNs (Maglóczy et al., 1994). Our experimental strategy allowed for the direct examination of  
412 the post-synaptic targets of SuM glutamatergic axons. Our results confirm that PNs in area CA2  
413 indeed receive excitatory synapses from SuM axons. However, in contrast to what had been  
414 proposed in previous studies, we observed that SuM inputs target not only PNs but also INs in  
415 area CA2. Importantly, we identified a specific subpopulation of INs as PV+ BCs which were  
416 the cell type most potently excited by SuM. These BCs could fire action potentials upon SuM  
417 inputs photostimulation leading to a substantial feedforward inhibition of neighboring PNs.  
418 Consistent with the perisomatic targeting of BCs axons, recruitment of BCs by SuM resulted in  
419 the control of PNs excitability. This finding demonstrates that SuM activity can pace action  
420 potential firing in PNs through recruitment of PV+ BCs. The inhibitory action of the SuM input



421 to area CA2 contrasts with the overall excitatory effect of the SuM-DG path (Hashimoto et al., 2018; Li et al., 2020; Mizumori et al., 1989; Nakanishi et al., 2001).

#### 423 Consequences of SuM input on area CA2 output

424 Recent work has demonstrated a strong excitatory drive from area CA2 to CA1 (Chevalleyre  
425 and Siegelbaum, 2010; Kohara et al., 2014; Nasrallah et al., 2019). Consequently, modification  
426 of CA2 output through synaptic plasticity (Nasrallah et al., 2019) or neuromodulation (Tirko et  
427 al., 2018) affects CA1 activity. This observation is critical when considering social memory  
428 formation, which is known to depend on CA2 output (Hitti and Siegelbaum, 2014; Stevenson  
429 and Caldwell, 2014) and is likely encoded in downstream ventral CA1 (Okuyama et al., 2016).  
430 CA2-targeting cells in the SuM have recently been shown to be highly active during novel  
431 social exploration (Chen et al., 2020). From our results, we hypothesize that this novel social  
432 signal from the SuM, acts via the PV+ inhibitory network in area CA2 to control the timing of  
433 CA2 output onto area CA1.

434 The population of INs potently excited by SuM transmission display many features that allow  
435 us to classify them as PV+ BCs. They have somas located in the somatic layer, have densely  
436 packed perisomatic-targeted axons, are fast spiking, show PV immuno-reactivity, are sensitive  
437 to MOR and DOR activation, and their selective silencing reduces SuM driven feed-forward  
438 inhibition of area CA2 PNs. Recent studies have indicated that DOR-mediated inhibitory  
439 synaptic plasticity of PV+ INs in area CA2 is required for social recognition memory  
440 (Domínguez et al., 2019) and further, that exposure to a novel conspecific induces a DOR-  
441 mediated plasticity in this same inhibitory network in area CA2 (Leroy et al., 2017) Thus, our  
442 finding that SuM input acts via PV+ interneurons fits with previous results, and provides a link  
443 between social novelty information and local hippocampal inhibitory plasticity.

444 By recruiting feedforward inhibition, SuM activity paces and temporally constrains AP firing  
445 from CA2 PNs undergoing depolarization. More critically, in conditions of elevated cholinergic  
446 tone relevant to SuM activity in vivo, CA2 PNs depolarize and fire bursts of APs that can be  
447 shaped by SuM input both by controlling AP firing as well as membrane depolarization. While  
448 this result was obtained by triggering SuM input stimulation to the onset of burst firing by CA2  
449 PNs, in vivo and acute slice experiments revealed a consistent influence of CA1 PN AP firing  
450 by SuM input to area CA2 regardless of the timing of SuM input stimulation relative to CA2  
451 PN AP burst firing. These results demonstrate a powerful control of SuM input over CA2 output  
452 when PNs are spontaneously firing bursts of APs, a firing mode that is most efficient at  
453 influencing CA1 activity (Tirko et al., 2018). Optogenetic experiments have recently shown



454 that CA2 PNs can drive a strong feedforward inhibition in area CA1 (Nasrallah et al., 2019).  
455 Although SuM input likely does not directly drive feedforward inhibition in area CA1 (Chen et  
456 al., 2020), the recruitment of feedforward inhibition in area CA2 by SuM input activation could  
457 curtail the time window of spontaneous firing in CA2 PNs and effectively lead to a  
458 synchronized drive of feedforward inhibition by area CA2 over area CA1. We postulate that  
459 the concerted IPSC that we detect in area CA1 with SuM fiber photostimulation in area CA2  
460 corresponds to the large decrease in firing that is observed in CA1 multi-unit recordings in vivo.  
461 Thus, these data provide evidence for a long-range control of CA2 bursting activity and the  
462 consequences in downstream area CA1 in conditions of high cholinergic tone that accompanies  
463 theta oscillations in vivo during which SuM is active.

#### 464 Gating of area CA2 activity by PV+ INs and significance for pathologies

465 The density of PV+ INs in area CA2 is strikingly higher than in neighboring areas CA3 and  
466 CA1 (Botcher et al., 2014; Piskorowski and Chevaleyre, 2013). This population of INs has been  
467 shown to play a powerful role in controlling the activation of CA2 PNs by CA3 inputs  
468 (Nasrallah et al., 2015). We show in this study that long-range inputs from the SuM can strongly  
469 recruit PV+ BCs, which in turn inhibit PNs in this area. Hence, both intra-hippocampal inputs  
470 from CA3 and long-range inputs from the SuM converge onto PV+ INs to control CA2 PN  
471 excitability and output.

472 Postmortem studies have reported losses of PV+ INs in area CA2 in pathological contexts  
473 including bipolar disorder (Benes et al., 1998), Alzheimer's disease (Brady and Mufson, 1997),  
474 and schizophrenia (Benes et al., 1998; Knable et al., 2004). Consistent with these reports, in a  
475 mouse model of the 22q11.2 deletion syndrome, we found a loss of PV staining and deficit of  
476 inhibitory transmission in area CA2 that were accompanied by impairments in social memory  
477 (Piskorowski et al., 2016). We postulate that the PV+ INs altered during pathological conditions  
478 may be the same population of PV+ BCs recruited by long-range SuM inputs. Indeed, the DOR-  
479 mediated plasticity onto PV+INs is altered in the 22q11.2 deletion syndrome, and we show here  
480 that the PV+ INs targeted by the SuM also express DOR. Thus, the loss of function of PV+ INs  
481 in area CA2 could disrupt proper long-range connection between the hippocampus and the  
482 hypothalamus and possibly contribute to some of the cognitive impairments observed in  
483 schizophrenia animal models. Further, pharmacological mouse models of schizophrenia have  
484 reported increased c-fos immunoreactivity in the SuM as well as memory impairments (Castañé  
485 et al., 2015). Although several alterations in these models of schizophrenia could lead to deficits

486 of hippocampal-dependent behavior, abnormalities of the SuM projection onto area CA2 appear  
487 as a potential mechanism that warrants further investigation.

488

## 489 **Materials & Methods**

490 All procedures involving animals were performed in accordance with institutional regulations.  
491 Animal sample sizes were estimated using power tests with standard deviations and ANOVA  
492 values from pilot experiments. A 15 % failure rate was assumed to account for stereotaxic  
493 injection errors and slice preparation complications.

494 Use of the Tg(Slc17ab-icre)10Ki mouse line: we used the Tg(Slc17ab-icre)10Ki mouse line  
495 that was previously generated (Borgius et al., 2010) and expresses the Cre recombinase under  
496 the control slc17a6 gene coding for the vesicular glutamate transporter isoform 2 (VGluT2).

497 Use of the csf2rb2-Cre mouse line: We used the csf2rb2-Cre mouse line that was recently  
498 generated (Chen et al., 2020) and expresses the Cre recombinase under control of the csf2rb2  
499 gene that shows selective expression in the SuM.

500 Use of the Pvalbtm1(cre)Arbr/J mouse line: we used the Pvalbtm1(cre)Arbr/J mouse line that  
501 was previously generated (Hippenmeyer et al., 2005) and expresses the Cre recombinase under  
502 the control Pvalbm gene coding for parvalbumin (PV).

503 Stereotaxic viral injection: Animals were anaesthetized with ketamine (100 mg/kg) and  
504 xylazine (7 mg/kg). The adeno-associated viruses AAV9.EF1a.DIO.hChR2(H134R).EYFP and  
505 AAV9.hSynapsin.EGFP.WPRE.bGH were used at  $3 \times 10^8$  vg, the  
506 AAV.Synapsin.DIO.hM4D(Gi).mCherry was used at  $3.6 \times 10^9$  vg and the  
507 AAV2/9.hSyn.hChR2(H134R).EYFP.WPRE.hGH was used at  $3.7 \times 10^{13}$  vg. The retrograde  
508 tracer CAV2-cre virus was used at  $2.5 \times 10^{12}$  vg. 500 nL of virus was unilaterally injected into  
509 the brain of 4 week-old male wild type C57BL6, Tg(Slc17ab-icre)10Ki (VGluT2-Cre), csf2rb2-  
510 cre (SuM-Cre) or Pvalbtm1(cre)Arbr/J (PV-Cre) mice at 100 nL/min and the injection cannula  
511 was left at the injection site for 10 min following infusion. In the case of  
512 AAV.Synapsin.DIO.hM4D(Gi)-mcherry injection in PV-Cre mice, bilateral injections were  
513 performed in dorsal CA2. The loci of the injection sites were as follows: anterior–posterior  
514 relative to bregma: -2.8 mm for SuM, -1.6 mm for CA2; medial-lateral relative to midline: 0  
515 mm for SuM, 1.9 mm for CA2; dorsal-ventral relative to surface of the brain: 4.75 mm for SuM,  
516 1.4 mm for CA2.

517 Electrophysiological recordings: Transverse hippocampal slices were prepared at least 3 weeks  
518 after viral injection and whole-cell patch-clamp recordings were performed from PNs and INs  
519 across the hippocampal CA regions. In the case of PV-Cre mice injected with  
520 AAV.Synapsin.DIO.hM4D(Gi)-mcherry, slices were prepared 6 weeks after viral injection.  
521 Animals were deeply anaesthetized with ketamine (100 mg/kg) and xylazine (7 mg/kg), and  
522 perfused transcardially with a N-methyl-D-glucamin-based (NMDG) cutting solution  
523 containing the following (in mM): NMDG 93, KCl 2.5, NaH<sub>2</sub>PO<sub>4</sub> 1.25, NaHCO<sub>3</sub> 30, HEPES  
524 20, glucose 25, thiourea 2, Na-ascorbate 5, Na-pyruvate 3, CaCl<sub>2</sub> 0.5, MgCl<sub>2</sub> 10. Brains were  
525 then rapidly removed, hippocampi were dissected out and placed upright into an agar mold and  
526 cut into 400  $\mu$ m thick transverse slices (Leica VT1200S) in the same cutting solution at 4 °C.  
527 Slices were transferred to an immersed-type chamber and maintained in artificial cerebro-spinal  
528 fluid (ACSF) containing the following (in mM) : NaCl 125, KCl 2.5, NaH<sub>2</sub>PO<sub>4</sub> 1.25, NaHCO<sub>3</sub>  
529 26, glucose 10, Na-pyruvate 2, CaCl<sub>2</sub> 2, MgCl<sub>2</sub> 1. Slices were incubated at 32°C for  
530 approximately 20 min then maintained at room temperature for at least 45 min prior to patch-  
531 clamp recordings performed with either potassium- or cesium-based intracellular solutions  
532 containing the following (in mM): K- or Cs-methyl sulfonate 135, KCl 5, EGTA-KOH 0.1,  
533 HEPES 10, NaCl 2, MgATP 5, Na<sub>2</sub>GTP 0.4, Na<sub>2</sub>-phosphocreatine 10 and biocytin (4 mg/mL).  
534 ChR2 was excited by 488 nm light delivered by a LED attached to the epifluorescence port of  
535 the microscope. Light stimulations trains consisted of 2-10 pulses, 0.5 ms long, delivered at 10  
536 Hz, repeated every 20 s for at least 20 sweeps. For the patch-clamp recordings in area CA1 with  
537 stimulation of SuM axons in area CA2, 50 ms long light stimulation pulses were delivered every  
538 10 seconds. We used a light intensity of 25 mW/mm<sup>2</sup> which was experimentally determined as  
539 the lowest irradiance allowing TTX-sensitive maximal responses in all cell types and  
540 conditions. Data were obtained using a Multiclamp 700B amplifier, sampled at 10 kHz and  
541 digitized using a Digidata. The pClamp10 software was used for data acquisition. Series  
542 resistance were < 20 MOhm and were not compensated in voltage-clamp, bridge balance was  
543 applied in current-clamp. An experimentally determined liquid junction potential of  
544 approximately 9 mV was not corrected for. Pharmacological agents were added to ACSF at the  
545 following concentrations (in  $\mu$ M): 10 NBQX and 50 D-APV to block AMPA and NMDA  
546 receptors, 1 SR95531 and 2 CGP55845A to block GABA<sub>A</sub> and GABA<sub>B</sub> receptors, 1 DAMGO  
547 to activate  $\mu$ -opioid receptors (MOR), 0.5 DPDPE to activate  $\delta$ -opioid receptors (DOR), 10  
548 clozapine N-oxide (CNO) to activate hM4D(Gi) DREADDs, 10 CCh to activate cholinergic  
549 receptors, 0.2 tetrodotoxin (TTX) to prevent sodic action potential generation.

550 Surgery for *in vivo* recordings: All surgeries were performed in a stereotaxic frame (Narishige).  
551 Csf2rb2-cre male mice from 3 to 6 months of age were anaesthetized using 500 mg/kg Avertin.  
552 pAAV.DIO.hChR2(H134R).EYFP was injected into the SuM (−2.7 mm AP, +0.4 mm ML,  
553 −5.0 mm DV) using a 10  $\mu$ L Hamilton microsyringe (701LT, Hamilton) with a beveled 33  
554 gauge needle (NF33BL, World Precision Instruments (WPI)). A microsyringe pump (UMP3,  
555 WPI) with controller (Micro4, WPI) were used to set the speed of the injection (100 nl/min).  
556 The needle was slowly lowered to the target site and remained in place for 5 min prior to start  
557 of the injection and the needle was removed 10 min after infusion was complete. Following  
558 virus injection, a custom-built screw-driven microdrive containing six independently adjustable  
559 nichrome tetrodes (14  $\mu$ m diameter), gold-plated to an impedance of 200 to 250 k $\Omega$  was  
560 implanted, with a subset of tetrodes targeting CA1, and an optic fiber (200  $\mu$ m core diameter,  
561 NA=0.22) targeting CA2 (−1.9 mm AP, +/- 2.2 mm ML, −1.6 mm DV). Following recovery,  
562 the tetrodes were slowly lowered over several days to CA1 pyramidal cell layer, identified by  
563 characteristic local field potential patterns (theta and sharp-wave ripples) and high amplitude  
564 multiunit activity. During the adjustment period the animal was habituated every day to a small  
565 box in which recording and stimulation were performed.

566 *In vivo* recording protocol: Recording was commenced following tetrodes reaching CA1. To  
567 examine the impact of SuM terminal stimulation in CA2 the mice were returned to the small  
568 familiar box and trains of 10 light pulses (473 nm, 10 mW/mm<sup>2</sup> and pulse width 50 ms) were  
569 delivered to the CA2 at 10 Hz. The pulse train was repeated every 10 seconds for at least 20  
570 times as the animals freely explored the box. Multiunit activity was recorded using a  
571 DigitalLynx 4SX recording system running Cheetah v.5.6.0 acquisition software (Neuralynx).  
572 Broadband signals from each tetrode were filtered between 600 and 6,000 Hz and recorded  
573 continuously at 32 kHz. Recording sites were later verified histologically with electrolytic  
574 lesions as described above and the position of the optic fiber was also verified from the track.

575 *In Vivo* data analysis:

576 Spike and event timestamps corresponding to onset of each laser pulse were imported into  
577 Matlab (MathWorks) and spikes which occurred 50 ms before and 100 ms after each laser pulse  
578 were extracted. Raster plots were generated using a 1 ms bin size. Similar results were obtained  
579 using 5 ms and 10 ms bin size (data not shown). Firing rate histograms were calculated by  
580 dividing total number of spikes in each time bin by that bin's duration. Each firing rate  
581 histogram was normalized by converting it into z-score values. Mean standard deviation values  
582 for the z-score calculation were taken from pre-laser pulse time period. To average the response

583 across all mice, for each tetrode the firing rate in each bin was normalized to the average rate  
584 in the pre-laser period.

585 Immunocytochemistry and cell identification: Midbrains containing the injection site were  
586 examined post-hoc to ensure that infection was restricted to the SuM.

587 Post-hoc reconstruction of neuronal morphology and SuM axonal projections were performed  
588 on slices and midbrain tissue following overnight incubation in 4 % paraformaldehyde in  
589 phosphate buffered saline (PBS). Midbrain sections were re-sliced sagittally to 100  $\mu$ m thick  
590 sections. Slices were permeabilized with 0.2 % triton in PBS and blocked overnight with 3 %  
591 goat serum in PBS with 0.2 % triton. Primary antibody (life technologies) incubation was  
592 carried out in 3 % goat serum in PBS overnight at 4°C. Channelrhodopsin-2 was detected by  
593 chicken primary antibody to GFP (Life technologies) (1:10,000 dilution) and a alexa488-  
594 conjugated goat-anti chick secondary. Other primary antibodies used were mouse anti-RGS14  
595 (Neuromab) (1:300 dilution), rabbit anti- PCP4 (Sigma) (1:600 dilution), guinea pig anti-vGlut2  
596 antibody (Milipore) (1:10,000 dilution), rabbit anti-parvalbumin antibody (Swant) (dilution  
597 1:2000). Alexa-546-conjugated streptavidin (life technologies), secondary antibodies and far-  
598 red neurotrace (life technologies) incubations were carried out in block solution for 4 hours at  
599 room temperature. Images were collected with a Zeiss 710 laser-scanning confocal microscope.

600 Reconstructed neurons were classified as either PNs or INs based on the extension and  
601 localization of their dendrites and axons. CA1, CA2 and CA3 PNs were identified based on  
602 their somatic localization, dendritic arborization and presence of thorny excrescences (TE).  
603 Among INs with somas located in the pyramidal layer (stratum pyramidale, SP), discrimination  
604 between BCs and non-BCs was achieved based on the restriction of their axons to SP or not,  
605 respectively. When available, firing patterns upon injection of depolarizing current step  
606 injection, action potential (AP) half-width, amount of repolarizing sag current upon  
607 hyperpolarization from -70 mV to -100 mV by current step injection, membrane resistance ( $R_M$ )  
608 and capacitance ( $C_M$ ) were additionally used for cell identification. CA2 and CA3a PNs  
609 displayed similar firing patterns, AP width, sag current,  $R_M$  and  $C_M$ . In contrast, INs had faster  
610 firing rates, shorter AP width, higher  $R_M$  and lower  $C_M$  than PNs. BCs further differed from  
611 non-BCs by the presence of a larger sag current. All recorded neurons that could not be  
612 unequivocally identified as PNs or INs were excluded from analysis.

613 Data analysis and statistics: Electrophysiological recordings were analyzed using IGORpro  
614 (Wavemetrics) and Clampfit (Molecular devices) software. For accurate measurements of the  
615 kinetics and latencies of post-synaptic responses, the following detection process was used. For

616 each cell, average traces were used to create a template waveform that was then fitted to  
617 individual traces and measurements were performed on the fitted trace. When only amplitudes  
618 of responses were needed, standard average peak detection was used. Results are reported  $\pm$   
619 SEM. Statistical significance was assessed using  $\chi^2$  test, Student's T test, Mann-Whitney U test,  
620 Wilcoxon signed-rank test, Kolmogorov-Smirnoff test, Kruskal-Wallis test, one-way or two-  
621 way ANOVA where appropriate.

622

### 623 **Author Contributions**

624 RAP, VR & TM designed experiments. RAP, VR, VC, LT, RB, AJYH performed experiments.  
625 VR, RAP and DP completed analysis. VR and RAP wrote the manuscript with input from all  
626 authors.

627

### 628 **Acknowledgments**

629 This work was supported by the RIKEN Center for Brain Science (TJM), Grant-in-Aid for  
630 Scientific Research from MEXT (19H05646; T.J.M), Grant-in-Aid for Scientific Research on  
631 Innovative Areas from MEXT (19H05233; T.J.M), Agence Nationale de la Recherche ANR-  
632 12-BSV4-0021-01 (VC), ANR-13-JSV4-0002-01 (RAP), ANR-18-CE37-0020-01 (RAP), the  
633 Ville de Paris Programme Emergences (RAP), and the Brain and Behavioral Research  
634 Foundation NARSAD Young Investigator Grant (RAP) and the Foundation Recherche  
635 Médicale, FRM:FTD20170437387 (VR).

636

### 637 **References**

638 Aranda, L., Santín, L.J., Begega, A., Aguirre, J.A., and Arias, J.L. (2006). Supramammillary  
639 and adjacent nuclei lesions impair spatial working memory and induce anxiolytic-like  
640 behavior. *Behav Brain Res* 167, 156–164.

641 Aranda, L., Begega, A., Sánchez-López, J., Aguirre, J.A., Arias, J.L., and Santín, L.J. (2008).  
642 Temporary inactivation of the supramammillary area impairs spatial working memory and  
643 spatial reference memory retrieval. *Physiology Behav* 94, 322–330.

644 Bartesaghi, R., and Ravasi, L. (1999). Pyramidal neuron types in field CA2 of the guinea pig.  
645 *Brain Research Bulletin* 50, 263–273.



- 646 Benes, F.M., Kwok, E.W., Vincent, S.L., and Todtenkopf, M.S. (1998). A reduction of  
647 nonpyramidal cells in sector CA2 of schizophrenics and manic depressives. *Biol Psychiat* *44*,  
648 88–97.
- 649 Berger, B., Esclapez, M., Alvarez, C., Meyer, G., and Catala, M. (2001). Human and monkey  
650 fetal brain development of the supramammillary-hippocampal projections: A system involved  
651 in the regulation of theta activity. *J Comp Neurol* *429*, 515–529.
- 652 Boehringer, R., Polygalov, D., Huang, A.J.Y., Middleton, S.J., Robert, V., Wintzer, M.E.,  
653 Piskorowski, R.A., Chevaleyre, V., and McHugh, T.J. (2017). Chronic Loss of CA2  
654 Transmission Leads to Hippocampal Hyperexcitability. *Neuron* *94*, 642–655.e9.
- 655 Borgius, L., Restrepo, C.E., Leao, R.N., Saleh, N., and Kiehn, O. (2010). A transgenic mouse  
656 line for molecular genetic analysis of excitatory glutamatergic neurons. *Mol Cell Neurosci* *45*,  
657 245–257.
- 658 Borhegyi, Z., Maglóczy, Z., Acsády, L., and Freund, T.F. (1998). The supramammillary  
659 nucleus innervates cholinergic and GABAergic neurons in the medial septum-diagonal band  
660 of Broca complex. *Neuroscience* *82*, 1053–1065.
- 661 Botcher, N.A., Falck, J.E., Thomson, A.M., and Mercer, A. (2014). Distribution of  
662 interneurons in the CA2 region of the rat hippocampus. *Frontiers Neuroanatomy* *8*, 104.
- 663 Boulland, J.-L., Jenstad, M., Boekel, A.J., Wouterlood, F.G., Edwards, R.H., Storm-Mathisen,  
664 J., and Chaudhry, F.A. (2009). Vesicular glutamate and GABA transporters sort to distinct  
665 sets of vesicles in a population of presynaptic terminals. *Cereb Cortex* *19*, 241–248.
- 666 Brady, D.R., and Mufson, E.J. (1997). Parvalbumin-immunoreactive neurons in the  
667 hippocampal formation of Alzheimer’s diseased brain. *Neuroscience* *80*, 1113–1125.
- 668 Buzsáki, G., and Moser, E.I. (2013). Memory, navigation and theta rhythm in the  
669 hippocampal-entorhinal system. *Nat Neurosci* *16*, 130–138.
- 670 Castañé, A., Santana, N., and Artigas, F. (2015). PCP-based mice models of schizophrenia:  
671 differential behavioral, neurochemical and cellular effects of acute and subchronic treatments.  
672 *Psychopharmacology* *232*, 4085–4097.
- 673 Cembrowski, M.S., Wang, L., Sugino, K., Shields, B.C., Spruston, N., and Marder, E. (2016).  
674 Hipposeq: a comprehensive RNA-seq database of gene expression in hippocampal principal  
675 neurons. *Elife* *5*, e14997.
- 676 Chen, S., He L., Huang, A.J.Y., Boehringer, R., Robert, V., Wintzer, M.E., Polygalov, D.,  
677 Weitemier, A.Z., Tao, Y., Gu, M., Middleton, S.J, Namiki, K., Hama, H., Therreau, L.,  
678 Chevaleyre, V., Hioki, H., Miyawaki, A., Piskorowski, R.A., McHugh, T.J. (2020). A  
679 hypothalamic novelty signal modulates hippocampal memory. *Nature*, *in press*.
- 680 Chevaleyre, V., and Siegelbaum, S.A. (2010). Strong CA2 pyramidal neuron synapses define  
681 a powerful disynaptic cortico-hippocampal loop. *Neuron* *66*, 560–572.



- 682 Dasgupta, A., Lim, Y.J., Kumar, K., Baby, N., Pang, K.L.K., Benoy, A., Behnisch, T., and  
683 Sajikumar, S. (2020). Group III metabotropic glutamate receptors gate long-term potentiation  
684 and synaptic tagging/capture in rat hippocampal area CA2. *ELife* 9, 919–920.
- 685 Domínguez, S., Rey, C.C., Therreau, L., Fanton, A., Massotte, D., Verret, L., Piskorowski,  
686 R.A., and Chevaleyre, V. (2019). Maturation of PNN and ErbB4 Signaling in Area CA2  
687 during Adolescence Underlies the Emergence of PV Interneuron Plasticity and Social  
688 Memory. *CellReports* 29, 1099-1112.e4.
- 689 Eichenbaum, H., and Cohen, N.J. (2014). Can we reconcile the declarative memory and  
690 spatial navigation views on hippocampal function? *Neuron* 83, 764–770.
- 691 Glickfeld, L.L., Atallah, B.V., and Scanziani, M. (2008). Complementary modulation of  
692 somatic inhibition by opioids and cannabinoids. *J Neurosci* 28, 1824–1832.
- 693 Gutiérrez-Guzmán, B.E., Hernández-Pérez, J.J., López-Vázquez, M.Á., Fregozo, C.S.,  
694 Guevara, M.Á., and Olvera-Cortés, M.E. (2012). Serotonin depletion of  
695 supramammillary/posterior hypothalamus nuclei produces place learning deficiencies and  
696 alters the concomitant hippocampal theta activity in rats. *Eur J Pharmacol* 682, 99–109.
- 697 Haglund, L., Swanson, L.W., and Köhler, C. (1984). The projection of the supramammillary  
698 nucleus to the hippocampal formation: an immunohistochemical and anterograde transport  
699 study with the lectin PHA-L in the rat. *J Comp Neurol* 229, 171–185.
- 700 Halasy, K., Hajszan, T., Kovács, E.G., Lam, T.-T., and Leranath, C. (2004). Distribution and  
701 origin of vesicular glutamate transporter 2-immunoreactive fibers in the rat hippocampus.  
702 *Hippocampus* 14, 908–918.
- 703 Hashimoto, Y., Karube, F., Yanagawa, Y., Fujiyama, F., and Kano, M. (2018).  
704 Supramammillary Nucleus Afferents to the Dentate Gyrus Co-release Glutamate and GABA  
705 and Potentiate Granule Cell Output. *Cell Reports* 25, 2704-2715.e4.
- 706 Hernández-Pérez, J.J., Gutiérrez-Guzmán, B.E., López-Vázquez, M.Á., and Olvera-Cortés,  
707 M.E. (2015). Supramammillary serotonin reduction alters place learning and concomitant  
708 hippocampal, septal, and supramammillary theta activity in a Morris water maze. *Frontiers*  
709 *Pharmacol* 6, 250.
- 710 Hippenmeyer, S., Vrieseling, E., Sigrist, M., Portmann, T., Laengle, C., Ladle, D.R., and  
711 Arber, S. (2005). A Developmental Switch in the Response of DRG Neurons to ETS  
712 Transcription Factor Signaling. *Plos Biol* 3, e159.
- 713 Hitti, F.L., and Siegelbaum, S.A. (2014). The hippocampal CA2 region is essential for social  
714 memory. *Nature* 508, 88–92.
- 715 Ikemoto, S. (2005). The supramammillary nucleus mediates primary reinforcement via  
716 GABA(A) receptors. *Neuropsychopharmacol* 30, 1088–1095.
- 717 Ikemoto, S., Witkin, B.M., Zangen, A., and Wise, R.A. (2004). Rewarding effects of AMPA  
718 administration into the supramammillary or posterior hypothalamic nuclei but not the ventral  
719 tegmental area. *J Neurosci* 24, 5758–5765.

- 720 Ito, H.T., Moser, E.I., and Moser, M.-B. (2018). Supramammillary Nucleus Modulates Spike-  
721 Time Coordination in the Prefrontal-Thalamo- Hippocampal Circuit during Navigation.  
722 *Neuron* 99, 576-587.e5.
- 723 Ito, M., Shirao, T., Doya, K., and Sekino, Y. (2009). Three-dimensional distribution of Fos-  
724 positive neurons in the supramammillary nucleus of the rat exposed to novel environment.  
725 *Neurosci Res* 64, 397–402.
- 726 Kay, K., Sosa, M., Chung, J.E., Karlsson, M.P., Larkin, M.C., and Frank, L.M. (2016). A  
727 hippocampal network for spatial coding during immobility and sleep. *Nature* 531, 185–190.
- 728 Kiss, J., Csáki, Á., Bokor, H., Shanabrough, M., and Leranth, C. (2000). The supramammillo-  
729 hippocampal and supramammillo-septal glutamatergic/aspartatergic projections in the rat: a  
730 combined [3H]d-aspartate autoradiographic and immunohistochemical study. *Neuroscience*  
731 97, 657–669.
- 732 Klausberger, T., and Somogyi, P. (2008). Neuronal diversity and temporal dynamics: the  
733 unity of hippocampal circuit operations. *Science* 321, 53–57.
- 734 Knable, M.B., Barci, B.M., Webster, M.J., Meador-Woodruff, J., Torrey, E.F., and  
735 Consortium, S.N. (2004). Molecular abnormalities of the hippocampus in severe psychiatric  
736 illness: postmortem findings from the Stanley Neuropathology Consortium. *Mol Psychiatr* 9,  
737 609-20–544.
- 738 Kocsis, B., and Vertes, R.P. (1994). Characterization of neurons of the supramammillary  
739 nucleus and mammillary body that discharge rhythmically with the hippocampal theta rhythm  
740 in the rat. *J Neurosci* 14, 7040–7052.
- 741 Kohara, K., Pignatelli, M., Rivest, A.J., Jung, H.-Y., Kitamura, T., Suh, J., Frank, D.,  
742 Kajikawa, K., Mise, N., Obata, Y., et al. (2014). Cell type-specific genetic and optogenetic  
743 tools reveal hippocampal CA2 circuits. *Nat Neurosci* 17, 269–279.
- 744 Lein, E.S., Zhao, X., and Gage, F.H. (2004). Defining a Molecular Atlas of the Hippocampus  
745 Using DNA Microarrays and High-Throughput In Situ Hybridization. *Journal of*  
746 *Neuroscience* 24, 3879–3889.
- 747 Leroy, F., Brann, D.H., Meira, T., and Siegelbaum, S.A. (2017). Input-Timing-Dependent  
748 Plasticity in the Hippocampal CA2 Region and Its Potential Role in Social Memory. *Neuron*  
749 95, 1089-1102.e5.
- 750 Li, Y., Bao, H., Luo, Y., Yoan, C., Sullivan, H.A., Quintanilla, L., Wickersham, I., Lazarus,  
751 M., Shin, Y.-Y.I., and Song, J. (2020). Supramammillary nucleus synchronizes with dentate  
752 gyrus to regulate spatial memory retrieval through glutamate release. *ELife* 9, 604–623.
- 753 Maglóczy, Z., Acsády, L., and Freund, T.F. (1994). Principal cells are the postsynaptic  
754 targets of supramammillary afferents in the hippocampus of the rat. *Hippocampus* 4, 322–  
755 334.
- 756 May, M.V.L., Hume, C., Sabatier, N., Schéle, E., Bake, T., Bergström, U., Menzies, J., and  
757 Dickson, S.L. (2019). Activation of the rat hypothalamic supramammillary nucleus by food

- 758 anticipation, food restriction or ghrelin administration. *Journal of Neuroendocrinology* *31*,  
759 e12676-14.
- 760 Mizumori, S.J., McNaughton, B.L., and Barnes, C.A. (1989). A comparison of  
761 supramammillary and medial septal influences on hippocampal field potentials and single-unit  
762 activity. *Journal of Neurophysiology* *61*, 15–31.
- 763 Nakanishi, K., Saito, H., and Abe, K. (2001). The supramammillary nucleus contributes to  
764 associative EPSP-spike potentiation in the rat dentate gyrus in vivo. *Eur J Neurosci* *13*, 793–  
765 800.
- 766 Nasrallah, K., Piskorowski, R.A., and Chevaleyre, V. (2015). Inhibitory Plasticity Permits the  
767 Recruitment of CA2 Pyramidal Neurons by CA3(1,2,3). *Eneuro* *2*, 1–12.
- 768 Nasrallah, K., Therreau, L., Robert, V., Huang, A.J.Y., McHugh, T.J., Piskorowski, R.A., and  
769 Chevaleyre, V. (2019). Routing Hippocampal Information Flow through Parvalbumin  
770 Interneuron Plasticity in Area CA2. *Cell Reports* *27*, 86-98.e3.
- 771 No, R.L. de (1934). Studies on the Structure of the Cerebral Cortex. II. Continuation of the  
772 Study of the Ammonic System. *Journal f. Psychologie and Neurologie* 113–175.
- 773 Okuyama, T., Kitamura, T., Roy, D.S., Itohara, S., and Tonegawa, S. (2016). Ventral CA1  
774 neurons store social memory. *Science* *353*, 1536–1541.
- 775 Oliva, A., Fernández-Ruiz, A., Buzsáki, G., and Berényi, A. (2016). Role of Hippocampal  
776 CA2 Region in Triggering Sharp-Wave Ripples. *Neuron* *91*, 1342–1355.
- 777 Pan, W., and McNaughton, N. (2002). The role of the medial supramammillary nucleus in the  
778 control of hippocampal theta activity and behaviour in rats. *Eur J Neurosci* *16*, 1797–1809.
- 779 Pan, W.-X., and McNaughton, N. (1997). The medial supramammillary nucleus, spatial  
780 learning and the frequency of hippocampal theta activity. *Brain Res* *764*, 101–108.
- 781 Pan, W.-X., and Mcnaughton, N. (2004). The supramammillary area: its organization,  
782 functions and relationship to the hippocampus. *Prog Neurobiol* *74*, 127–166.
- 783 Pawelzik, H., Hughes, D.I., and Thomson, A.M. (2002). Physiological and morphological  
784 diversity of immunocytochemically defined parvalbumin- and cholecystokinin-positive  
785 interneurons in CA1 of the adult rat hippocampus. *J Comp Neurol* *443*, 346–367.
- 786 Pedersen, N.P., Ferrari, L., Venner, A., Wang, J.L., Abbott, S.B.G., Vujovic, N., Arrigoni, E.,  
787 Saper, C.B., and Fuller, P.M. (2017). Supramammillary glutamate neurons are a key node of  
788 the arousal system. *Nat Commun* *8*, 1–16.
- 789 Piskorowski, R.A., and Chevaleyre, V. (2013). Delta-opioid receptors mediate unique  
790 plasticity onto parvalbumin-expressing interneurons in area CA2 of the hippocampus. *J*  
791 *Neurosci* *33*, 14567–14578.
- 792 Piskorowski, R.A., Nasrallah, K., Diamantopoulou, A., Mukai, J., Hassan, S.I., Siegelbaum,  
793 S.A., Gogos, J.A., and Chevaleyre, V. (2016). Age-Dependent Specific Changes in Area CA2

- 794 of the Hippocampus and Social Memory Deficit in a Mouse Model of the 22q11.2 Deletion  
795 Syndrome. *Neuron* 89, 163–176.
- 796 Plaisier, F., Hume, C., and Menzies, J. (2020). Neural connectivity between the hypothalamic  
797 supramammillary nucleus and appetite- and motivation-related regions of the rat brain.  
798 *Journal of Neuroendocrinology* jne.12829-31.
- 799 Renouard, L., Billwiller, F., Ogawa, K., Clément, O., Camargo, N., Abdelkarim, M., Gay, N.,  
800 Scoté-Blachon, C., Touré, R., Libourel, P.-A., et al. (2015). The supramammillary nucleus  
801 and the claustrum activate the cortex during REM sleep. *Sci Adv* 1, e1400177–e1400177.
- 802 Robert, V., Therreau, L., Davatolhagh, M.F., Bernardo-Garcia, F.J., Clements, K.N.,  
803 Chevaleyre, V., and Piskorowski, R.A. (2020). The mechanisms shaping CA2 pyramidal  
804 neuron action potential bursting induced by muscarinic acetylcholine receptor activation. *J*  
805 *Gen Physiol* 152.
- 806 Shahidi, S., Motamedi, F., and Naghdi, N. (2004). Effect of reversible inactivation of the  
807 supramammillary nucleus on spatial learning and memory in rats. *Brain Res* 1026, 267–274.
- 808 Soussi, R., Zhang, N., Tahtakran, S., Houser, C.R., and Esclapez, M. (2010). Heterogeneity of  
809 the supramammillary-hippocampal pathways: evidence for a unique GABAergic  
810 neurotransmitter phenotype and regional differences. *Eur J Neurosci* 32, 771–785.
- 811 Srinivas, K.V., Buss, E.W., Sun, Q., Santoro, B., Takahashi, H., Nicholson, D.A., and  
812 Siegelbaum, S.A. (2017). The Dendrites of CA2 and CA1 Pyramidal Neurons Differentially  
813 Regulate Information Flow in the Cortico-Hippocampal Circuit. *J Neurosci* 37, 3276–3293.
- 814 Stagkourakis, S., Spigolon, G., Williams, P., Protzmann, J., Fisone, G., and Broberger, C.  
815 (2018). A neural network for intermale aggression to establish social hierarchy. *Nat Neurosci*  
816 21, 834–842.
- 817 Stevenson, E.L., and Caldwell, H.K. (2014). Lesions to the CA2 region of the hippocampus  
818 impair social memory in mice. *Eur J Neurosci* 40.
- 819 Sun, Q., Srinivas, K.V., Sotayo, A., and Siegelbaum, S.A. (2014). Dendritic Na(+) spikes  
820 enable cortical input to drive action potential output from hippocampal CA2 pyramidal  
821 neurons. *Elife* 3, 7750.
- 822 Tirko, N.N., Eyring, K.W., Carcea, I., Mitre, M., Chao, M.V., Froemke, R.C., and Tsien,  
823 R.W. (2018). Oxytocin Transforms Firing Mode of CA2 Hippocampal Neurons. *Neuron* 100,  
824 593-608.e3.
- 825 Vertes, R.P. (1992). PHA-L analysis of projections from the supramammillary nucleus in the  
826 rat. *J Comp Neurol* 326, 595–622.
- 827 Vertes, R.P., and Kocsis, B. (1997). Brainstem-diencephalo-septohippocampal systems  
828 controlling the theta rhythm of the hippocampus. *Neuroscience* 81, 893–926.

829 Vicente, A.F., Slézia, A., Ghestem, A., Bernard, C., and Quilichini, P.P. (2020). In Vivo  
830 Characterization of Neurophysiological Diversity in the Lateral Supramammillary Nucleus  
831 during Hippocampal Sharp-wave Ripples of Adult Rats. *Neuroscience* 435, 95–111.

832 Wyss, J.M., Swanson, L.W., and Cowan, W.M. (1979). Evidence for an input to the  
833 molecular layer and the stratum granulosum of the dentate gyrus from the supramammillary  
834 region of the hypothalamus. *Anat Embryol* 156, 165–176.

835 Zhao, M., Choi, Y.-S., Obrietan, K., and Dudek, S.M. (2007). Synaptic plasticity (and the lack  
836 thereof) in hippocampal CA2 neurons. *J Neurosci* 27, 12025–12032.

837

838

### 839 **Figures legends**

#### 840 **Figure 1. Selective functional mapping of SuM neurons that project to hippocampal area**

841 **CA2.** A. Left, diagram illustrating the injection of AAVs into the SuM. Middle, sagittal image

842 indicating the infected SuM area expressing hCHR2(H134R)-EYFP (green). Right, expanded

843 view of injection site in the *Csf2rbr-Cre* mouse line. B. Left, hCHR2(H134R)-EYFP -

844 expressing SuM fibers (green) and nissl staining (blue) in the hippocampus. Right, higher

845 magnification image of area CA2 with hCHR2(H134R)-EYFP -expressing SuM fibers (green)

846 and nissl staining (blue) and RGS14 staining (magenta) to label area CA2. C. CA2 pyramidal

847 neurons in the SuM-innervated region receive excitatory transmission. (C1) Example CA2 PN

848 reconstruction (dendrites in black, axons in grey, hippocampal stratum borders shown in dotted

849 line, area demarcated in blue corresponds to the expanded image in C2). (C2) Biocytin labeling

850 of the recorded cell proximal dendrites, scale bar represents 10  $\mu\text{m}$ . (C3) AP firing and

851 repolarizing sag current in response to steps of +800 and -400 pA current injection. (C4) Light-

852 evoked EPSPs (top traces, individual traces shown in grey, average trace shown in black) and

853 EPSCs (bottom traces, individual traces shown in grey, average trace shown in black). **D.** CA3

854 pyramidal neurons in the SuM-innervated region receive excitatory transmission. (D1) Example

855 CA3 PN reconstruction (dendrites in brown, axons in light brown, hippocampal stratum borders

856 shown in dotted line, area demarcated in blue corresponds to the expanded image in D2). (D2)

857 Biocytin labeling of the recorded cell proximal dendrites, note the presence of thorny

858 excrescences, as indicated by the red arrows; scale bar represents 10  $\mu\text{m}$ . (D3) AP firing and

859 repolarizing sag current in response to steps of +800 and -400 pA current injection. (D4) Light-

860 evoked EPSPs (top traces, individual traces shown in grey, average trace shown in black) and

861 EPSCs (bottom traces, individual traces shown in grey, average trace shown in black). **E.**

862 Diagram illustrating the whole-cell recordings of area CA2 PNs and SuM fiber light stimulation  
863 in acute slice preparation. F. Sample traces of three 10 Hz SuM light-evoked PSPs before and  
864 after blocking inhibitory transmission (control shown in black, SR95531 & CGP55845A shown  
865 in grey). G. Summary graph of light-evoked PSP amplitudes recorded in PNs before and after  
866 application of 1  $\mu$ M SR95531 & 2  $\mu$ M CGP55845A (individual cells shown as thin lines,  
867 population average shown as thick line, error bars represent SEM, n = 14; Wilcoxon signed-  
868 rank tests, p = 0.004 for the first PSP, p = 0.013 for the second PSP, p < 0.001 for the third  
869 PSP).

870

871 **Figure 2. SuM input provides excitatory glutamatergic transmission to diverse population**  
872 **of PNs in area CA2.** A-B. Left, diagrams illustrating whole-cell recordings in area CA2 and  
873 SuM fiber stimulation in acute slice preparation. Middle, example reconstruction of different  
874 cell types (soma and dendrites in thick lines, axon in thin lines, hippocampal strata in dotted  
875 grey lines). Right, sample traces of light-evoked EPSPs (top, individual traces in grey, average  
876 trace in black) and EPSCs (bottom, individual traces in grey, average trace in black). A. A  
877 Basket cell in area CA2. B. Non-basket cell. C. Summary graph of light-evoked EPSC potencies  
878 in PNs, BCs and non-BCs in area CA2 (individual cells shown as dots, population average  
879 shown as thick line, error bars represent SEM, PNs : n = 166; BC INs: n = 18; non-BCs: n =  
880 13; Kruskal-Wallis test with Dunn-Holland-Wolfe post hoc test, p = 0.022). D. Summary graph  
881 of light-evoked PSP amplitudes in PNs, BCs and non-BCs (individual cells shown as dots,  
882 population average shown as thick line, error bars represent SEM, PNs : n = 20; BCs : n = 10;  
883 non-BCs : n = 4; Kruskal-Wallis test with Dunn-Holland-Wolfe post hoc test, p < 0.001). E.  
884 Left, proportion of post-synaptic CA2 PNs, BCs and non-BCs firing action potentials time-  
885 locked to light stimulation of SuM input. Right, sample traces of light-evoked action potentials  
886 in a BC recorded in current-clamp at resting membrane potential (top) and in cell-attached  
887 (bottom) configurations.

888

889 **Figure 3. SuM inputs provide excitation to Parvalbumin-expressing BCs.** A. Three  
890 biocytin reconstructions of BC INs with dendrites in red and axons in light red. Inset, current  
891 clamp steps to -400 pA and +400 pA display high-frequency AP firing and repolarizing sag  
892 current. B. Corresponding light-evoked EPSCs and EPSPs for the three reconstructed neurons  
893 (individual traces in grey, average trace in black). C. Corresponding PV immunostaining of the



894 three interneurons: parvalbumin staining, biocytin labeling of the recorded cell, and merge (PV  
895 in magenta and biocytin in green).

896

897 **Figure 4. Parvalbumin-expressing BCs mediate the feedforward inhibition recruited by**  
898 **photostimulation of SuM fibers.** A. Application of the mu-opioid receptor agonist, DAMGO,  
899 results in the complete abolition of light-evoked SuM inhibitory transmission. A1, sample  
900 traces (top, control in red, DAMGO in grey) and summary graph of light-evoked IPSC  
901 amplitudes recorded in area CA2 PNs before and after application of 1  $\mu$ M DAMGO (bottom,  
902 n = 6, error bars represent SEM). A2, sample traces (top, SR95531 & CGP55845A in black,  
903 DAMGO in grey) and summary graph of light-evoked EPSC amplitudes recorded in area CA2  
904 PNs before and after application of 1  $\mu$ M DAMGO (bottom, n = 17, error bars represent SEM).  
905 B. Application of the delta-opioid receptor agonist, DPDPE, results in the long-term depression  
906 of light-evoked SuM inhibitory transmission. B1, sample traces (top, control in red, DPDPE in  
907 grey) and summary graph of light-evoked IPSC amplitudes recorded in area CA2 PNs before  
908 and after application of 0.5  $\mu$ M DPDPE (bottom, n = 7, error bars represent SEM). B2, sample  
909 traces (top, SR95531 & CGP55845A in black, DAMGO in grey) and summary graph of light-  
910 evoked EPSC amplitudes recorded in area CA2 PNs before and after application of 0.5  $\mu$ M  
911 DPDPE (bottom, n = 7, error bars represent SEM). C. Left, diagrams illustrating the method to  
912 infect SuM neurons and selectively inhibit PV+ INs in area CA2. An AAV allowing the Cre-  
913 dependent expression of inhibitory DREADD was injected bilaterally into area CA2 of the  
914 dorsal hippocampus and another AAV allowing the expression of ChR2 was injected into the  
915 SuM of PV-Cre mice, allowing optogenetic stimulation of SuM inputs and pharmacogenetic  
916 inhibition of PV+ INs by application of the DREADD agonist CNO at 10  $\mu$ M. Right, diagram  
917 of the recording configuration. D. Silencing of PV+ INs by inhibitory DREADDs reduces SuM  
918 feedforward inhibition onto area CA2 PNs. Sample traces (left, control in red, CNO in grey)  
919 and summary graph (right) of light-evoked IPSC amplitudes recorded in CA2 PNs before and  
920 after application of 10  $\mu$ M CNO (n = 13, error bars represent SEM). E. Example immunostaining  
921 against PV and DREADD with biocytin labelling in area CA2 from a slice used in these  
922 experiments.

923

924 **Figure 5. Area CA2 PNs receive a net inhibitory drive from SuM that controls AP firing**  
925 **properties.** A. Diagram illustrating whole-cell recordings of area CA2 PNs and SuM fiber light  
926 stimulation in acute slice preparation. B. Example traces of a CA2 PN action potential firing in



927 response to current injection in the absence (black traces) or presence of 10 Hz photostimulation  
928 of SuM inputs (red traces). C. Action potential onset is increased with 10 Hz SuM input  
929 photostimulation. Left, sample traces of the first AP in control and with inhibition blocked by  
930 1  $\mu$ M SR95531 & 2  $\mu$ M CGP55845A application (light-off in black, light-on in red, light-off  
931 in SR95531 & CGP55845A in grey, light-on in SR95531 & CGP55845A in purple). Right,  
932 summary graph of photostimulation-induced delay of AP firing in area CA2 PNs before and  
933 after application of SR95531 & CGP55845A (control shown in red, n = 12, paired-T test, p =  
934 0.016; SR95531 & CGP55845A shown in purple, n = 6; Wilcoxon signed-rank test, p = 0.44;  
935 individual cells shown with dots, boxplot represents median, quartiles, 10<sup>th</sup> and 90<sup>th</sup> percentiles).  
936 D. Sample traces of AP firing in repeated trials (light-off in black, light-on in red, light-on in  
937 SR95531 & CGP55845A in purple; during experiment photostimulation was interleaved with  
938 control, but are grouped here for demonstration purposes). E. AP jitter in CA2 PNs is reduced  
939 by activation of SuM inputs. Left, summary graph of the standard deviation of AP firing with  
940 or without 10 Hz photostimulation (n = 12; Wilcoxon signed-rank test, p < 0.001 for the first  
941 AP, p = 0.008 for the second AP, p = 0.004 for the third AP; individual cells shown with thin  
942 lines, population average shown as thick line, error bars represent SEM). Right,  
943 photostimulation-induced reduction of AP firing standard deviation in control and in SR95531  
944 & CGP55845A (control, n = 12; Wilcoxon signed-rank tests, p < 0.001 for the first AP, p =  
945 0.008 for the second AP, p = 0.004 for the third AP; SR95531 & CGP55845A, n = 6; Wilcoxon  
946 signed-rank tests, p = 0.22 for the first AP, p = 0.16 for the second AP, p = 0.09 for the third  
947 AP; individual cells shown with dots, boxplot represents median, quartiles, 10<sup>th</sup> and 90<sup>th</sup>  
948 percentiles).

949

950 **Figure 6. SuM input shapes CA2 PN AP bursts in conditions of elevated cholinergic**  
951 **tone.** A. Diagram illustrating whole-cell recordings of area CA2 PNs with light stimulation of  
952 SuM fibers in an acute slice preparation. B. Sample trace of spontaneous AP bursting activity  
953 recorded from a CA2 PN during bath application of 10  $\mu$ M CCh. For every even-numbered  
954 burst, a 10 Hz photostimulation (blue bars) was delivered to excite SuM inputs in area CA2  
955 allowing a comparison of burst AP firing in the same cell. C. Sample traces of AP firing  
956 during bursts for light-off (left, black) and light-on (right, red) epochs. D. Comparison of AP  
957 number / burst for light-off (black) and light-on (red) events (n = 7; individual cells shown as  
958 thin lines, population average shown as thick line, error bars represent SEM; paired-T test, p =  
959 0.031). E. Average firing rate during spontaneous burst events with SuM photostimulation

960 (red, light-on) and controlled inter-leaved burst events (black, light-off). Shaded area  
961 represents SEM for 7 cells each with between 3 and 13 bursts analyzed in light-on and light-  
962 off conditions (2-way ANOVA, light factor:  $p < 0.001$ , time factor:  $p < 0.001$ , light x time  
963 factor:  $p = 0.052$ ). F. Example burst events with (red) and without (black) SuM  
964 photostimulation overlaid and on a scale that shows the rapidly hyperpolarizing membrane  
965 potential that occurs with SuM input stimulation. G. Comparison of bursts duration for events  
966 with (red) and without (black) photostimulation ( $n = 7$ ; individual cells shown as thin lines,  
967 population average shown as thick line, error bars represent SEM; paired-T test,  $p = 0.037$ ).  
968 H. Comparison of time elapsed to next burst onset following bursts with (red) or without  
969 (black) photostimulation ( $n = 7$ ; individual cells shown as thin lines, population average shown  
970 as thick line, error bars represent SEM; paired-T test,  $p = 0.001$ ).

971 **Figure 7. Consequences of SuM input on area CA2 output to CA1.** A. Diagram  
972 illustrating in vivo recording in CA1 with tetrodes and SuM axon terminals stimulation over  
973 CA2 with an implanted optical fiber. B. Representative data from 4 multi-unit recordings.  
974 Raster plot (top) showing CA1 AP firing activity before and during photostimulation of SuM  
975 fibers in area CA2. The corresponding firing rate histogram (middle) of four tetrodes placed  
976 in the CA1 pyramidal cell layers, as well as plots of standard deviation (SD; bottom). Red  
977 lines indicate  $\pm 3SD$ . C. Individual (grey) and average (red) normalized firing rates from 31  
978 multiunit recordings, 3 consecutive light stimulation epochs are displayed to help visualizing  
979 the consistency of the effect of SuM input light stimulation over area CA2 on CA1 multi-unit  
980 firing; the shaded area represents the SEM. D. Diagram illustrating whole-cell recordings of  
981 area CA1 PNs and SuM fiber light stimulation over area CA2 in acute slice preparation. E-H.  
982 Example waterfall plots (E, G) and corresponding peri-stimulus time histogram (F, H,  
983 population average shown as thick line, shaded area represents SEM) of EPSCs (black) and  
984 IPSCs (red) recorded from a CA1 PN ex vivo during photostimulation of SuM input over area  
985 CA2 with bath application of  $10 \mu M$  CCh.

986 **Supplemental figure legends**

987 **Supplemental Figure 1.**

988 A. Diagram illustrating the intersectional strategy used to label CA2-projecting SuM neurons.  
989 B – E. Labelling of CA2-projecting SuM neurons with the retrograde CAV-2 carrying Cre-  
990 recombinase injected in CA2 and the anterograde AAV carrying DIO-EGFP injected in SuM  
991 of wild type mice. B. Labelling of SuM fibers in the hippocampus from CA2-projecting SuM  
992 neurons. Left, nissl staining (blue) and EGFP expression (green) in the hippocampus. Right,  
993 PCP4 staining (magenta) and EGFP expression (green) in area CA2. C. Retrograde-labeled  
994 SuM neurons that project to hippocampal area CA2. Left, nissl staining (blue) and EGFP  
995 expression (green) in SuM. Right, calretinin staining (magenta) and EGFP expression (green)  
996 in SuM. D. Higher magnification image of CA2-projecting SuM neurons. Left, nissl staining  
997 (blue) and EGFP expression (green) in SuM. Center, nissl (blue) and calretinin staining  
998 (magenta) in SuM. Right, calretinin staining (magenta) and EGFP expression (green) in SuM.  
999 E. VGluT2 expression of CA2-projecting SuM neurons. Left, nissl staining (blue) and EGFP  
1000 expression (green) in SuM. Right, VGluT2 staining (red) and EGFP expression (green) in SuM.  
1001 F. Top, diagram illustrating the injection of AAVs into the SuM. Bottom, sagittal image of the  
1002 injection site in SuM to express hCHR2(H134R)-EYFP (green) in the VGluT2-Cre line. G and  
1003 H. Anterograde labelling of SuM projections to the hippocampus from AAV carrying DIO-  
1004 Chr2-EYFP injected in SuM of VGluT2-Cre mice. G. Left, VGluT2 (red) and nissl staining  
1005 (blue) in the hippocampus. Right, hCHR2(H134R)-EYFP -expressing SuM fibers (green) and  
1006 nissl (blue) staining in the hippocampus. H. Left, higher magnification image of area CA2 with  
1007 VGluT2 (red) and nissl (blue) staining. Center, hCHR2(H134R)-EYFP -expressing SuM fibers  
1008 (green) and nissl staining (blue). Right, hCHR2(H134R)-EYFP -expressing SuM fibers (green)  
1009 and VGluT2 staining (red).

1010 **Supplemental Figure 2.**

1011 A. Diagram illustrating the whole-cell recording configuration of PNs in area CA2 and SuM  
1012 fiber stimulation in acute hippocampal slices. B. Light-evoked EPCSs from SuM inputs are  
1013 completely blocked following application of tetrodotoxin (TTX). Sample traces (top, control  
1014 shown in black, +TTX shown in grey) and power-response curves (bottom) of light-evoked  
1015 EPSC amplitudes recorded in PN before (black) and after application of 0.2  $\mu$ M TTX (grey) at  
1016 different light intensities (n = 5, error bars represent SEM). C. Light-evoked EPCSs from SuM  
1017 inputs are completely blocked following application of NMDA and AMPA receptor blockers  
1018 (NBQX & APV). Sample traces (top, control shown in black, NBQX & APV shown in grey)

1019 and time course (bottom) of light-evoked EPSC amplitudes upon application of 10  $\mu$ M NBQX  
1020 & 50  $\mu$ M APV (n = 6, error bars represent SEM).

1021 **Supplemental Figure 3.**

1022 A. Diagram illustrating the whole-cell recording configuration of PNs in area CA2 and SuM  
1023 fiber stimulation in acute hippocampal slices. B and C. Effect of 10  $\mu$ M CCh on SuM light-  
1024 evoked PSCs recorded in CA2 PNs under different conditions : voltage clamp at -70 mV with  
1025 inhibitory transmission blocked (B, SR95531 & CGP55845A shown in grey, SR95531 &  
1026 CGP55845A + CCh shown in orange), and voltage clamp at +10 mV (C, control shown in red,  
1027 CCh shown in orange). Left, sample traces. Middle, power-response curves (B, n = 7; two-way  
1028 ANOVA with repeated measures, p < 0.001; C, n = 17; two-way ANOVA with repeated  
1029 measures, p < 0.001; error bars represent SEM). Right, comparison of PPRs (B, n = 7; paired-  
1030 T test, p < 0.001; C, n = 17; paired-T test, p = 0.001; individual cells shown as grey lines,  
1031 population average shown as horizontal line, error bars represent SEM).

**Table 1. Electrophysiological properties of pyramidal neurons in SuM-innervated area**

|                         | $V_M$ (mV)                            | $R_M$ (M $\Omega$ )                   | $C_M$ (pF)                            |
|-------------------------|---------------------------------------|---------------------------------------|---------------------------------------|
| CA2 PN (n = 81)         | $-69.8 \pm 0.70$                      | $59.2 \pm 2.65$                       | $209 \pm 11.4$                        |
| CA3 PN (n = 31)         | $-70.3 \pm 1.06$                      | $72.4 \pm 4.82$                       | $211 \pm 15.7$                        |
| Statistics              | Mann-Whitney<br>U test<br>$p = 0.997$ | Student<br>T test<br>$p = 0.020^*$    | Mann-Whitney<br>U test<br>$p = 0.625$ |
| PN deep (n = 57)        | $-71.1 \pm 0.76$                      | $64.0 \pm 3.94$                       | $200 \pm 12.3$                        |
| PN superficial (n = 76) | $-69.3 \pm 0.67$                      | $64.9 \pm 3.19$                       | $196 \pm 11.8$                        |
| Statistics              | Student<br>T test<br>$p = 0.077$      | Mann-Whitney<br>U test<br>$p = 0.777$ | Mann-Whitney<br>U test<br>$p = 0.588$ |

**Table 2. Characteristics of SuM light-evoked transmission onto pyramidal neurons**

| EPSC           |                            |                                     |                                     |                                     |                                     |                                     |
|----------------|----------------------------|-------------------------------------|-------------------------------------|-------------------------------------|-------------------------------------|-------------------------------------|
| cell type      | connectivity (%)           | amplitude (pA)                      | rise time (ms)                      | decay time (ms)                     | latency (ms)                        | success rate                        |
| CA2 PN         | 56 (n = 58 of 103)         | 16 ± 1.9                            | 2.9 ± 0.1                           | 14 ± 0.8                            | 2.4 ± 0.2                           | 0.44 ± 0.03                         |
| CA3 PN         | 49 (n = 22 of 45)          | 23 ± 5.9                            | 3.0 ± 0.2                           | 14 ± 0.9                            | 2.7 ± 0.3                           | 0.56 ± 0.06                         |
| Statistics     | $\chi^2$ test<br>p = 0.572 | Mann-Whitney<br>U test<br>p = 0.409 | Mann-Whitney<br>U test<br>p = 0.391 | Mann-Whitney<br>U test<br>p = 0.797 | Mann-Whitney<br>U test<br>p = 0.156 | Student<br>T test<br>p = 0.074      |
| PN deep        | 56 (n = 35 of 63)          | 15 ± 2.0                            | 3.5 ± 0.2                           | 16 ± 1.0                            | 3.5 ± 0.4                           | 0.39 ± 0.03                         |
| PN superficial | 56 (n = 53 of 94)          | 20 ± 3.0                            | 3.1 ± 0.2                           | 15 ± 0.9                            | 2.7 ± 0.3                           | 0.51 ± 0.04                         |
| Statistics     | $\chi^2$ test<br>p = 0.946 | Mann-Whitney<br>U test<br>p = 0.306 | Mann-Whitney<br>U test<br>p = 0.051 | Mann-Whitney<br>U test<br>p = 0.314 | Mann-Whitney<br>U test<br>p = 0.083 | Mann-Whitney<br>U test<br>p = 0.072 |
| IPSC           |                            |                                     |                                     |                                     |                                     |                                     |
| cell type      | connectivity (%)           | amplitude (pA)                      | rise time (ms)                      | decay time (ms)                     | latency (ms)                        | success rate                        |
| CA2 PN         | 35 (n = 19 of 55)          | 197 ± 41.3                          | 3.8 ± 0.4                           | 25 ± 1.2                            | 6.3 ± 0.7                           | 0.55 ± 0.06                         |
| CA3 PN         | 57 (n = 16 of 28)          | 145 ± 23.4                          | 4.5 ± 0.4                           | 25 ± 1.2                            | 7.5 ± 0.9                           | 0.54 ± 0.05                         |
| Statistics     | $\chi^2$ test<br>p = 0.134 | Mann-Whitney<br>U test              | Student<br>T test                   | Mann-Whitney<br>U test              | Mann-Whitney<br>U test              | Student<br>T test                   |

|                |                            | p = 0.870                           | p = 0.203                       | p = 0.896                      | p = 0.303                      | p = 0.893                      |
|----------------|----------------------------|-------------------------------------|---------------------------------|--------------------------------|--------------------------------|--------------------------------|
| PN deep        | 47 (n = 16 of 34)          | 199 ± 40.6                          | 3.8 ± 0.4                       | 25 ± 1.4                       | 7.2 ± 0.8                      | 0.52 ± 0.07                    |
| PN superficial | 47 (n = 26 of 55)          | 167 ± 27.5                          | 4.9 ± 0.4                       | 26 ± 1.2                       | 6.8 ± 0.7                      | 0.50 ± 0.05                    |
| Statistics     | $\chi^2$ test<br>p = 0.987 | Mann-Whitney<br>U test<br>p = 0.258 | Student<br>T test<br>p = 0.047* | Student<br>T test<br>p = 0.564 | Student<br>T test<br>p = 0.706 | Student<br>T test<br>p = 0.796 |



**Table 3. Electrophysiological properties of interneurons in SuM-innervated area**

|                          | $V_M$ (mV)                    | $R_M$ (M $\Omega$ )           | $C_M$ (pF)                       | firing adaptation index       | sag (mV)                      |
|--------------------------|-------------------------------|-------------------------------|----------------------------------|-------------------------------|-------------------------------|
| Basket cell (n = 16)     | $-57.3 \pm 1.38$              | $144 \pm 28.1$                | $64.0 \pm 8.70$                  | $0.74 \pm 0.05$               | $9.4 \pm 1.0$                 |
| non-Basket Cell (n = 12) | $-55.6 \pm 1.84$              | $224 \pm 46.8$                | $52.0 \pm 5.90$                  | $0.57 \pm 0.06$               | $5.9 \pm 1.4$                 |
| interneuron SO (n = 6)   | $-57.0 \pm 3.16$              | $201 \pm 21.0$                | $44.7 \pm 5.31$                  | $0.61 \pm 0.11$               | $7.6 \pm 1.9$                 |
| interneuron SR (n = 8)   | $-60.1 \pm 2.89$              | $282 \pm 49.8$                | $39.6 \pm 3.18$                  | $0.65 \pm 0.09$               | $8.1 \pm 2.1$                 |
| Statistics               | 1-way ANOVA test<br>p = 0.527 | 1-way ANOVA test<br>p = 0.100 | Kruskal-Wallis test<br>p = 0.354 | 1-way ANOVA test<br>p = 0.238 | 1-way ANOVA test<br>p = 0.292 |

**Table 4. Characteristics of excitatory SuM light-evoked transmission onto interneurons & pyramidal cells**

| cell type                                           | connectivity (%)                                         | amplitude (pA)                                                               | rise time (ms)                                                | decay time (ms)                                               | latency (ms)                  | success rate                  |
|-----------------------------------------------------|----------------------------------------------------------|------------------------------------------------------------------------------|---------------------------------------------------------------|---------------------------------------------------------------|-------------------------------|-------------------------------|
| Pyramidal Cell                                      | 63 (n = 166 of 263)                                      | 19 ± 1.6*                                                                    | 3.4 ± 0.1*                                                    | 15 ± 0.5*                                                     | 2.9 ± 0.1                     | 0.46 ± 0.02                   |
| Basket Cell                                         | 82 (n = 18 of 22)                                        | 43 ± 8.7*                                                                    | 1.7 ± 0.3*                                                    | 8.4 ± 1.3*                                                    | 3.1 ± 0.4                     | 0.59 ± 0.07                   |
| non-Basket Cell<br>interneuron SO<br>interneuron SR | 39 (n = 10 of 26)<br>12 (n = 2 of 17)<br>11 (n = 1 of 9) | 16 ± 2.8                                                                     | 2.6 ± 0.5                                                     | 12 ± 1.4                                                      | 3.4 ± 0.7                     | 0.36 ± 0.06                   |
| Statistics                                          | $\chi^2$ test<br>p = 0.006*                              | Kruskal-Wallis test<br>p = 0.016<br>Dunn-Holland-Wolfe post hoc<br>p < 0.05* | 1-way ANOVA test<br>p < 0.001<br>Tukey post hoc<br>p < 0.001* | 1-way ANOVA test<br>p < 0.001<br>Tukey post hoc<br>p < 0.001* | 1-way ANOVA test<br>p = 0.580 | 1-way ANOVA test<br>p = 0.066 |

AAV9.EF1a.DIO.hCHR2(H134R).EYFP

*Csf2rb2-Cre*

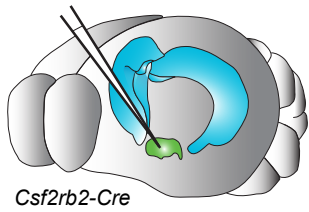

*Csf2rb2-Cre*

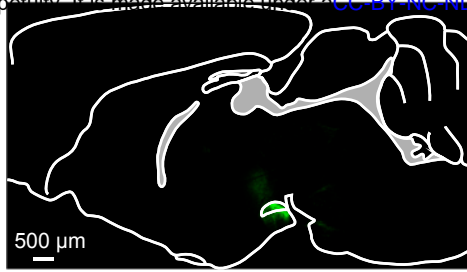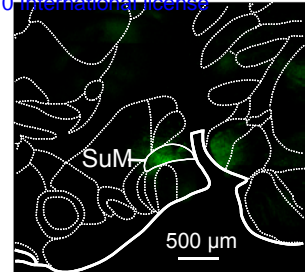

B

nissl / ChR2-EYFP

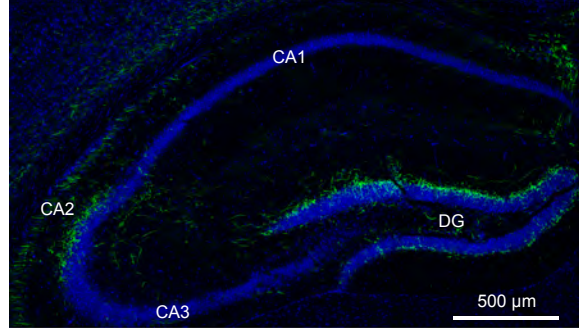

nissl / ChR2-EGFP

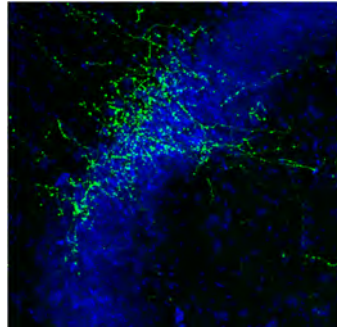

ChR2-EGFP / RGS14

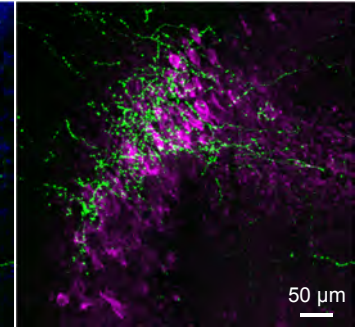

C CA2 pyramidal neuron

C1

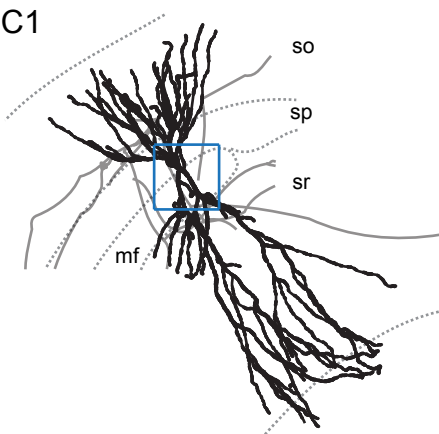

C2

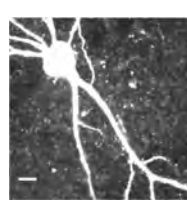

C3

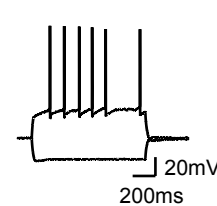

C4

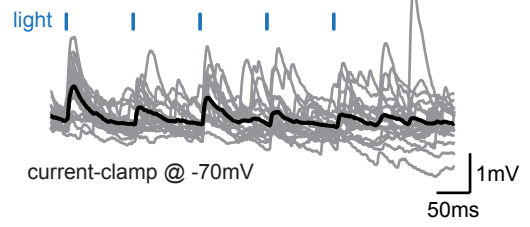

C3

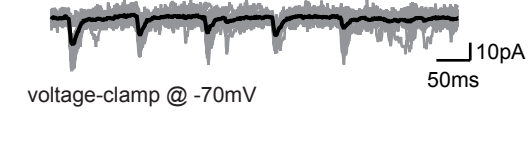

D CA3a pyramidal neuron

D1

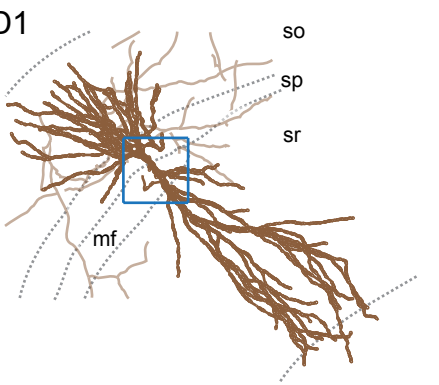

D2

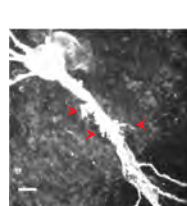

D3

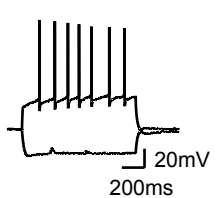

D4

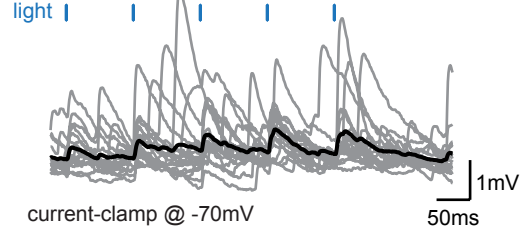

D3

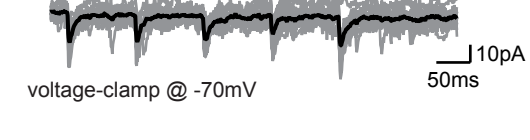

E

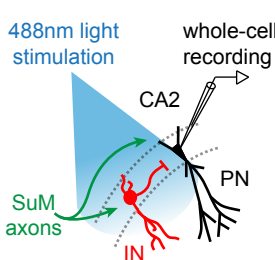

F

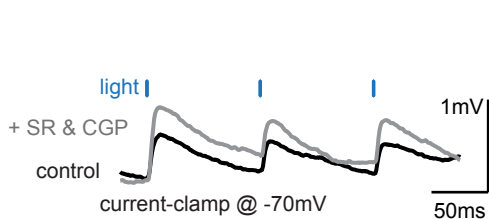

G

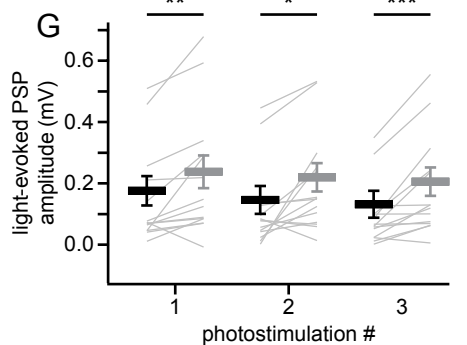

Figure 1.

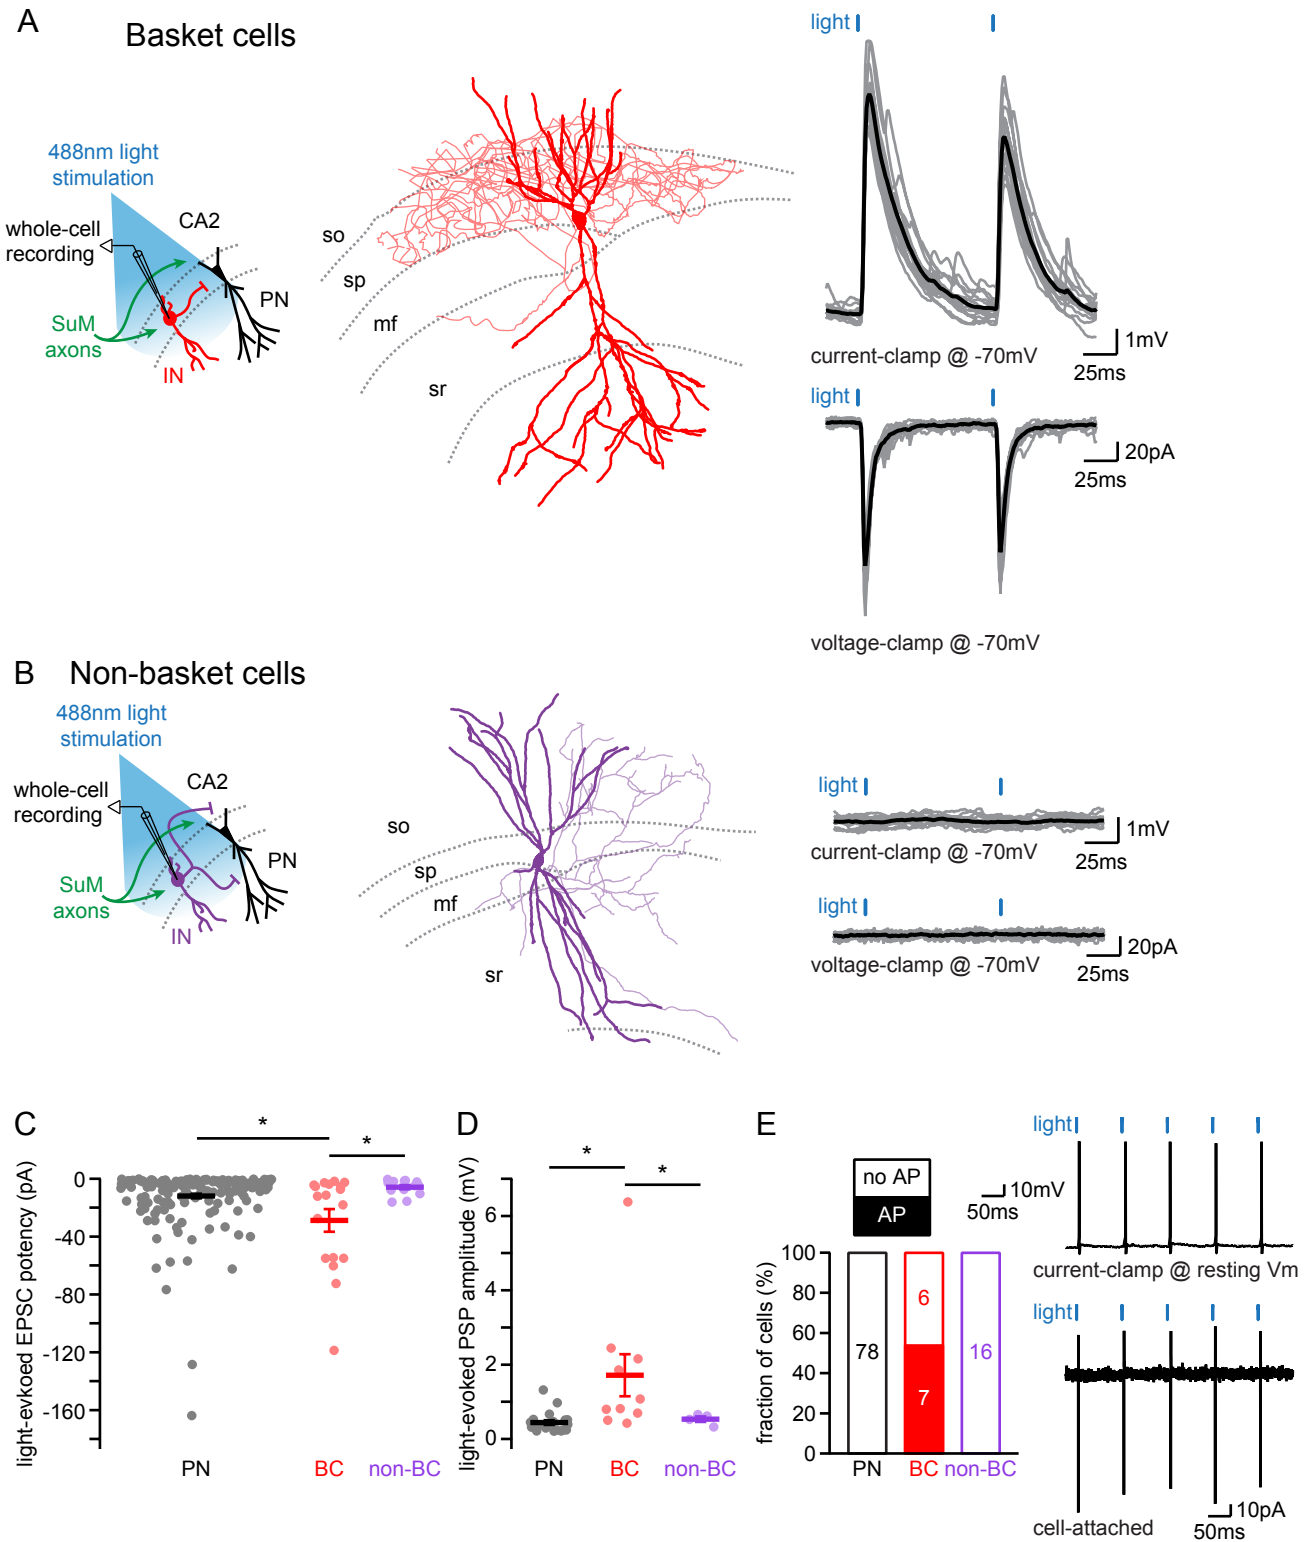

Figure 2.

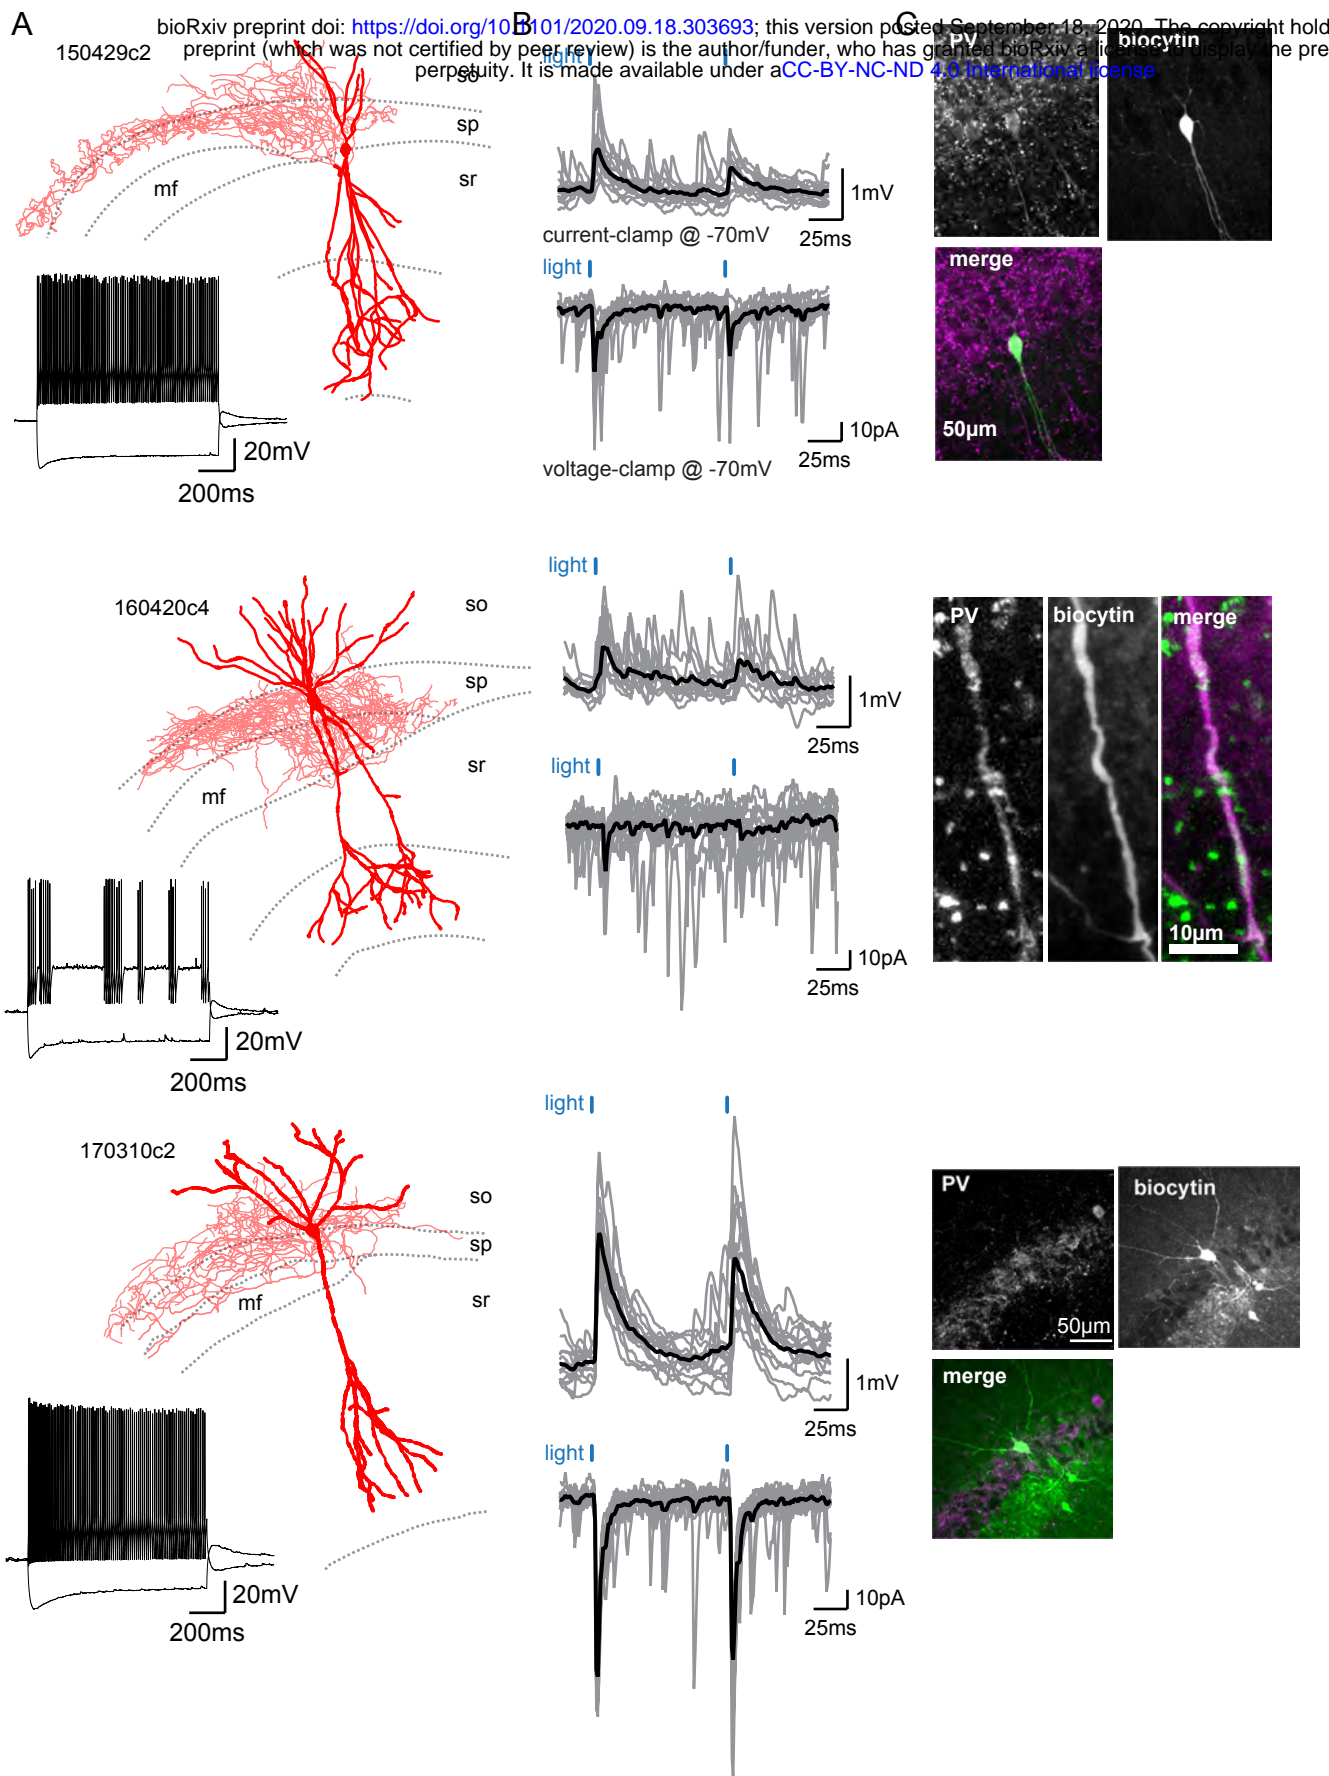

Figure 3.

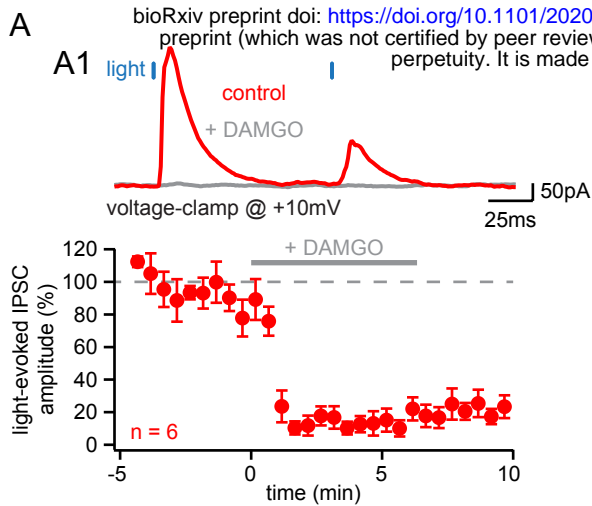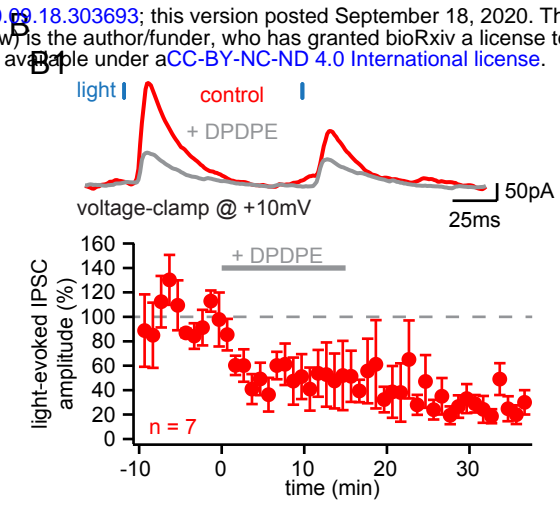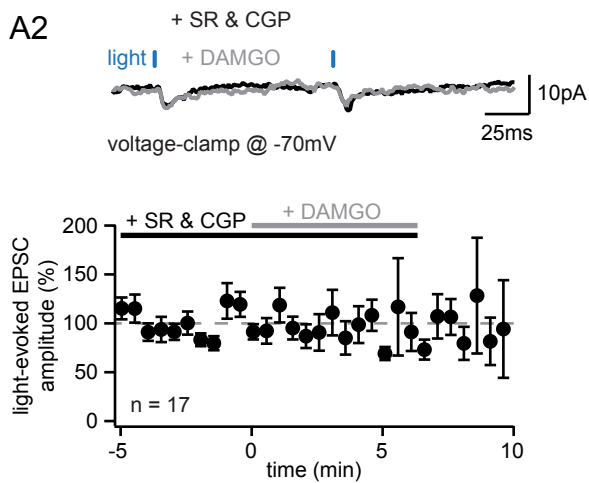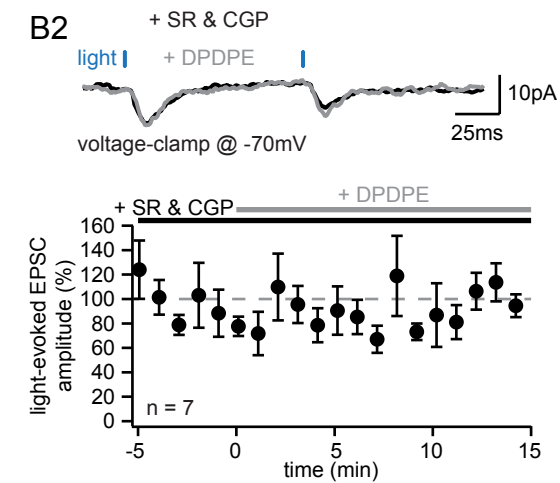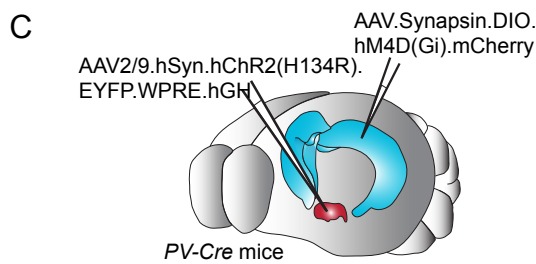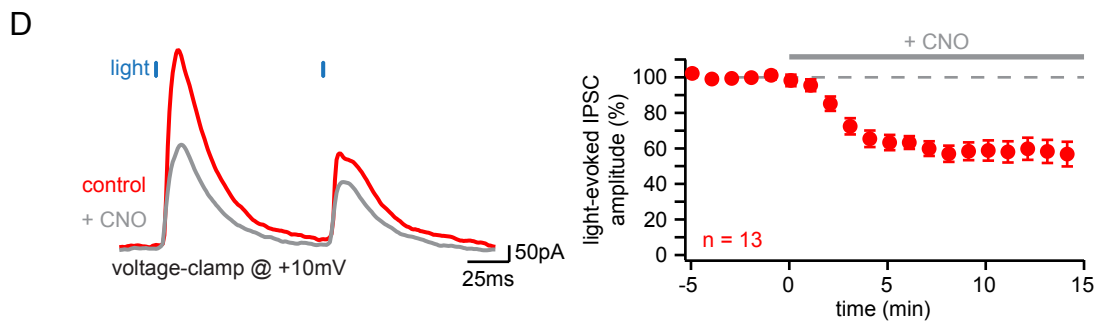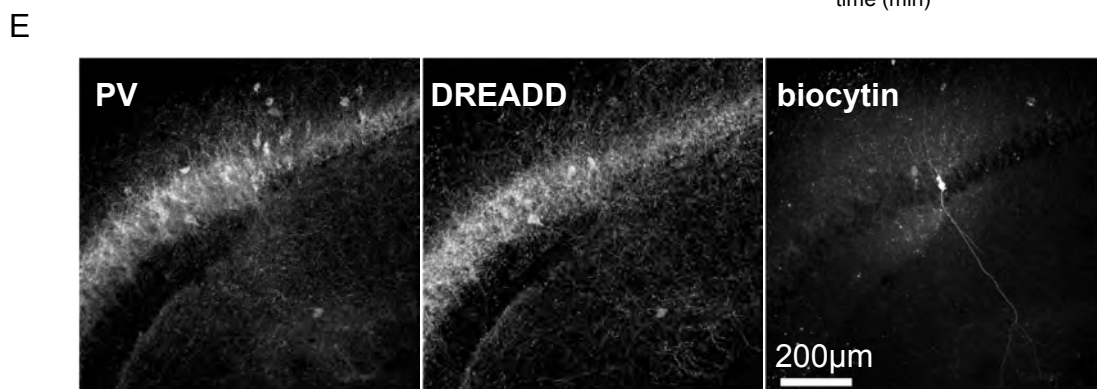

Figure 4.





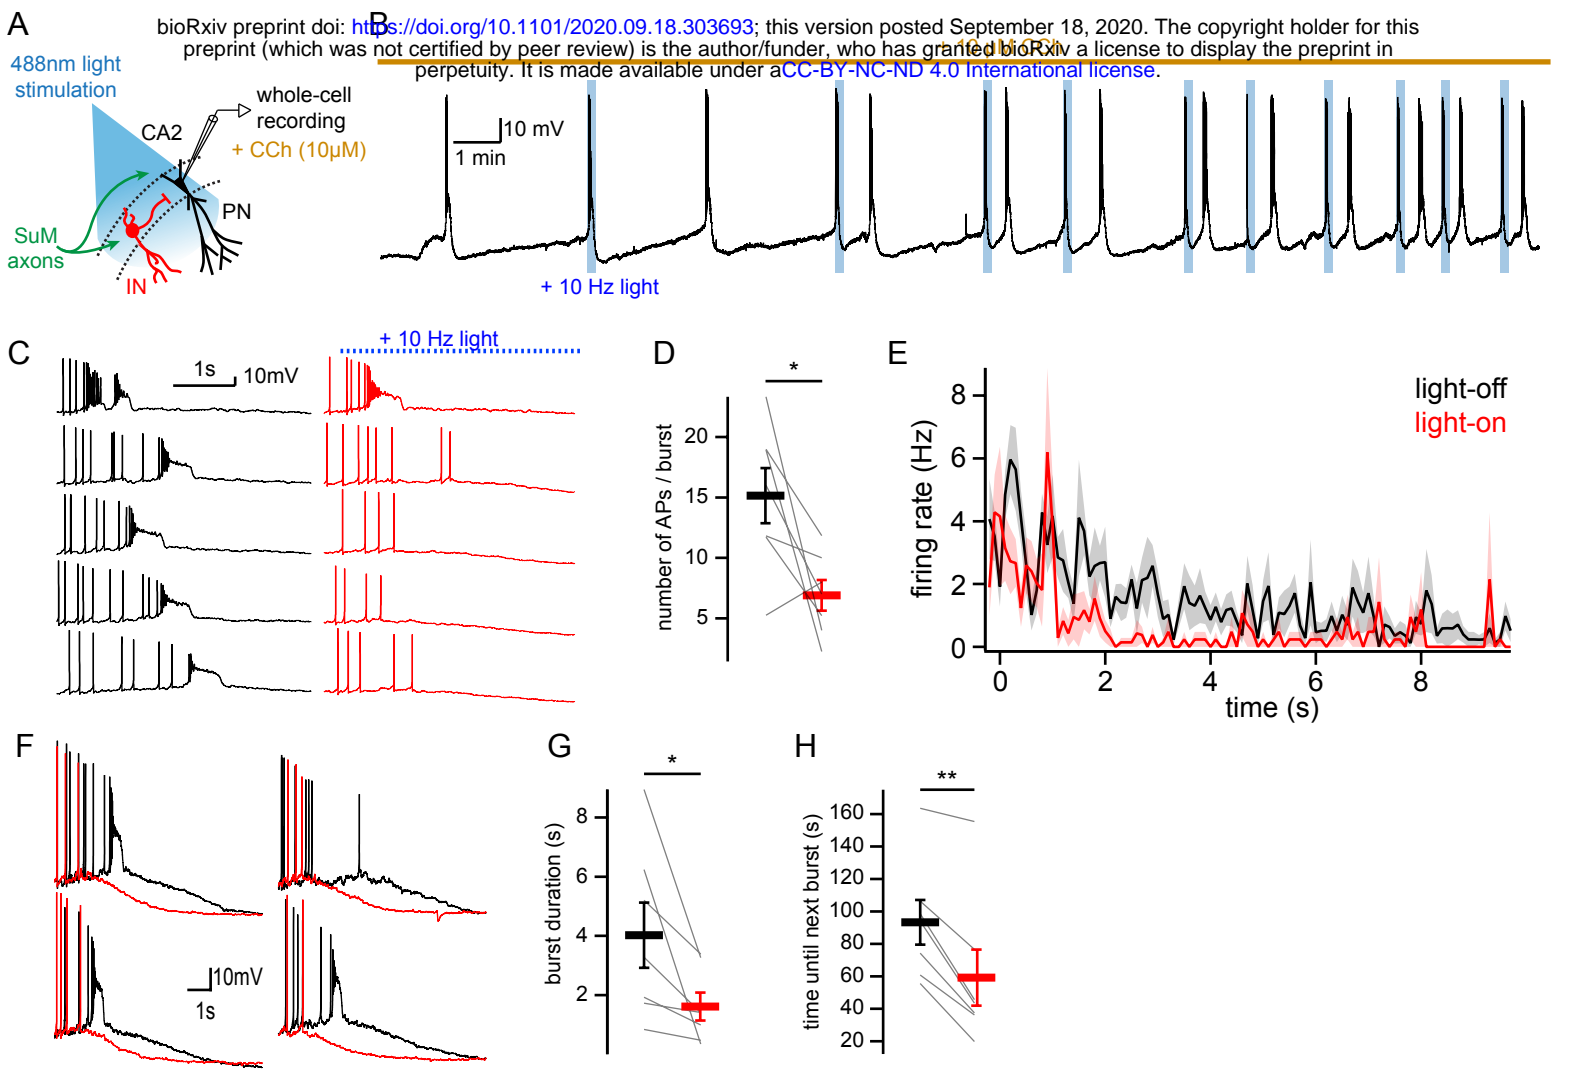

Figure 6.

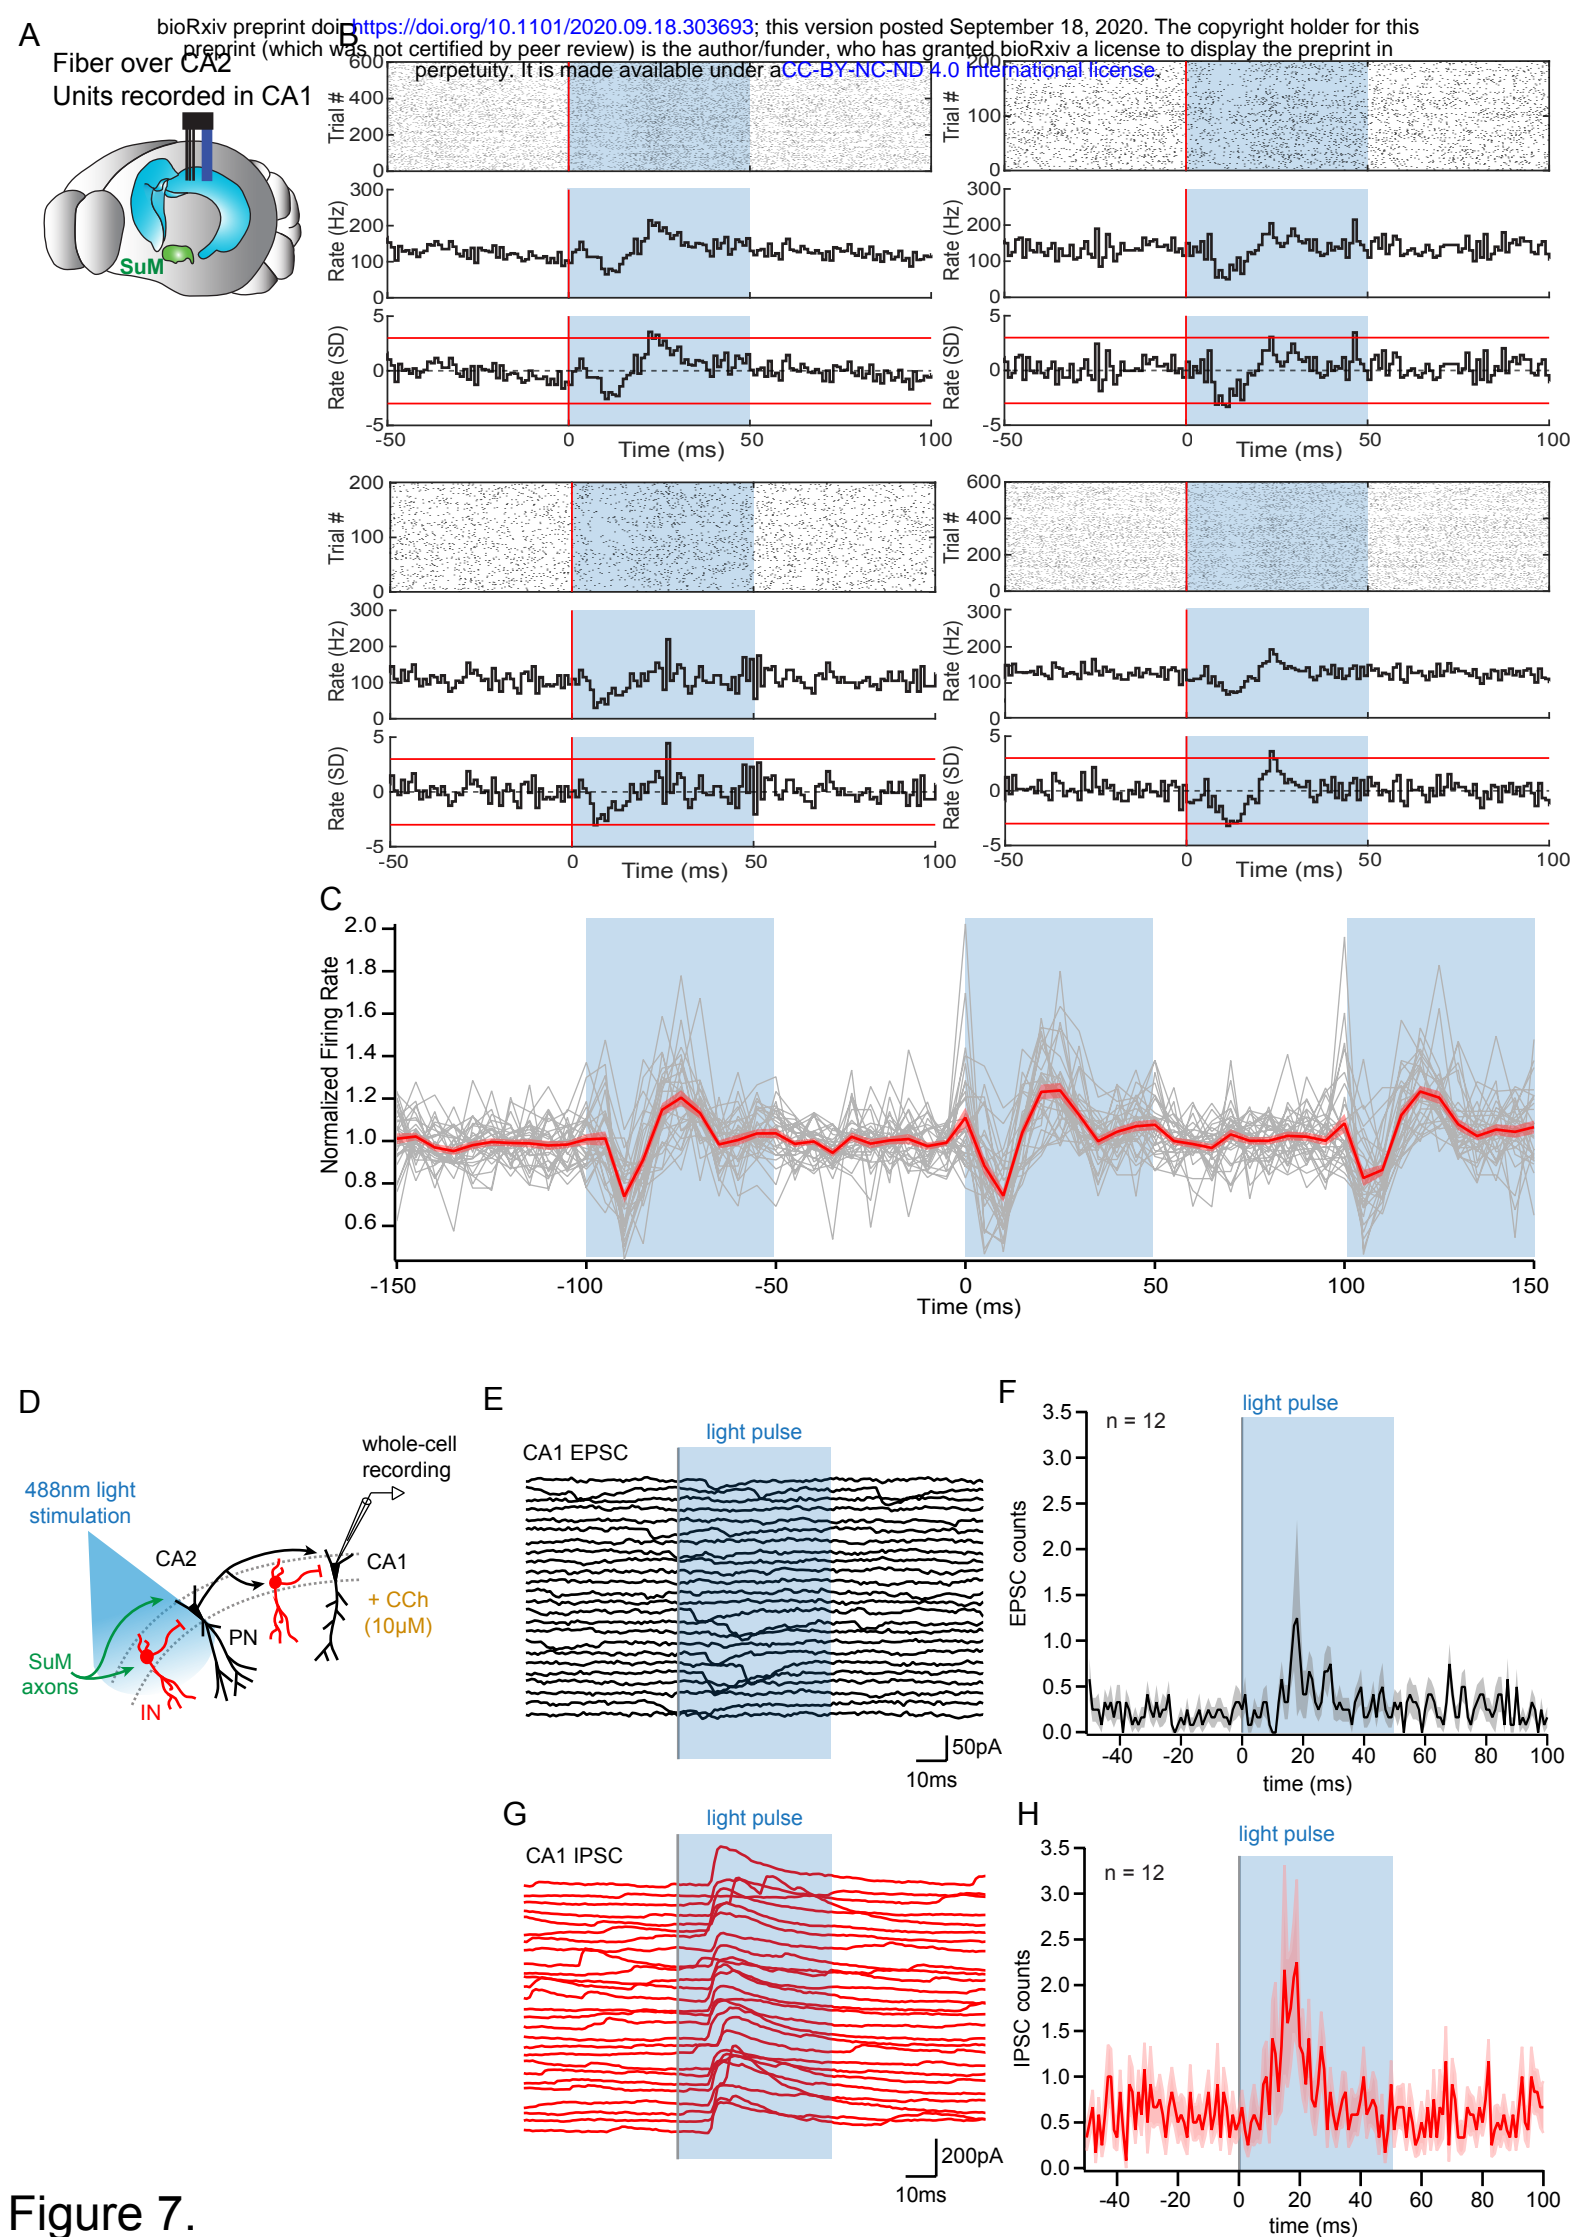



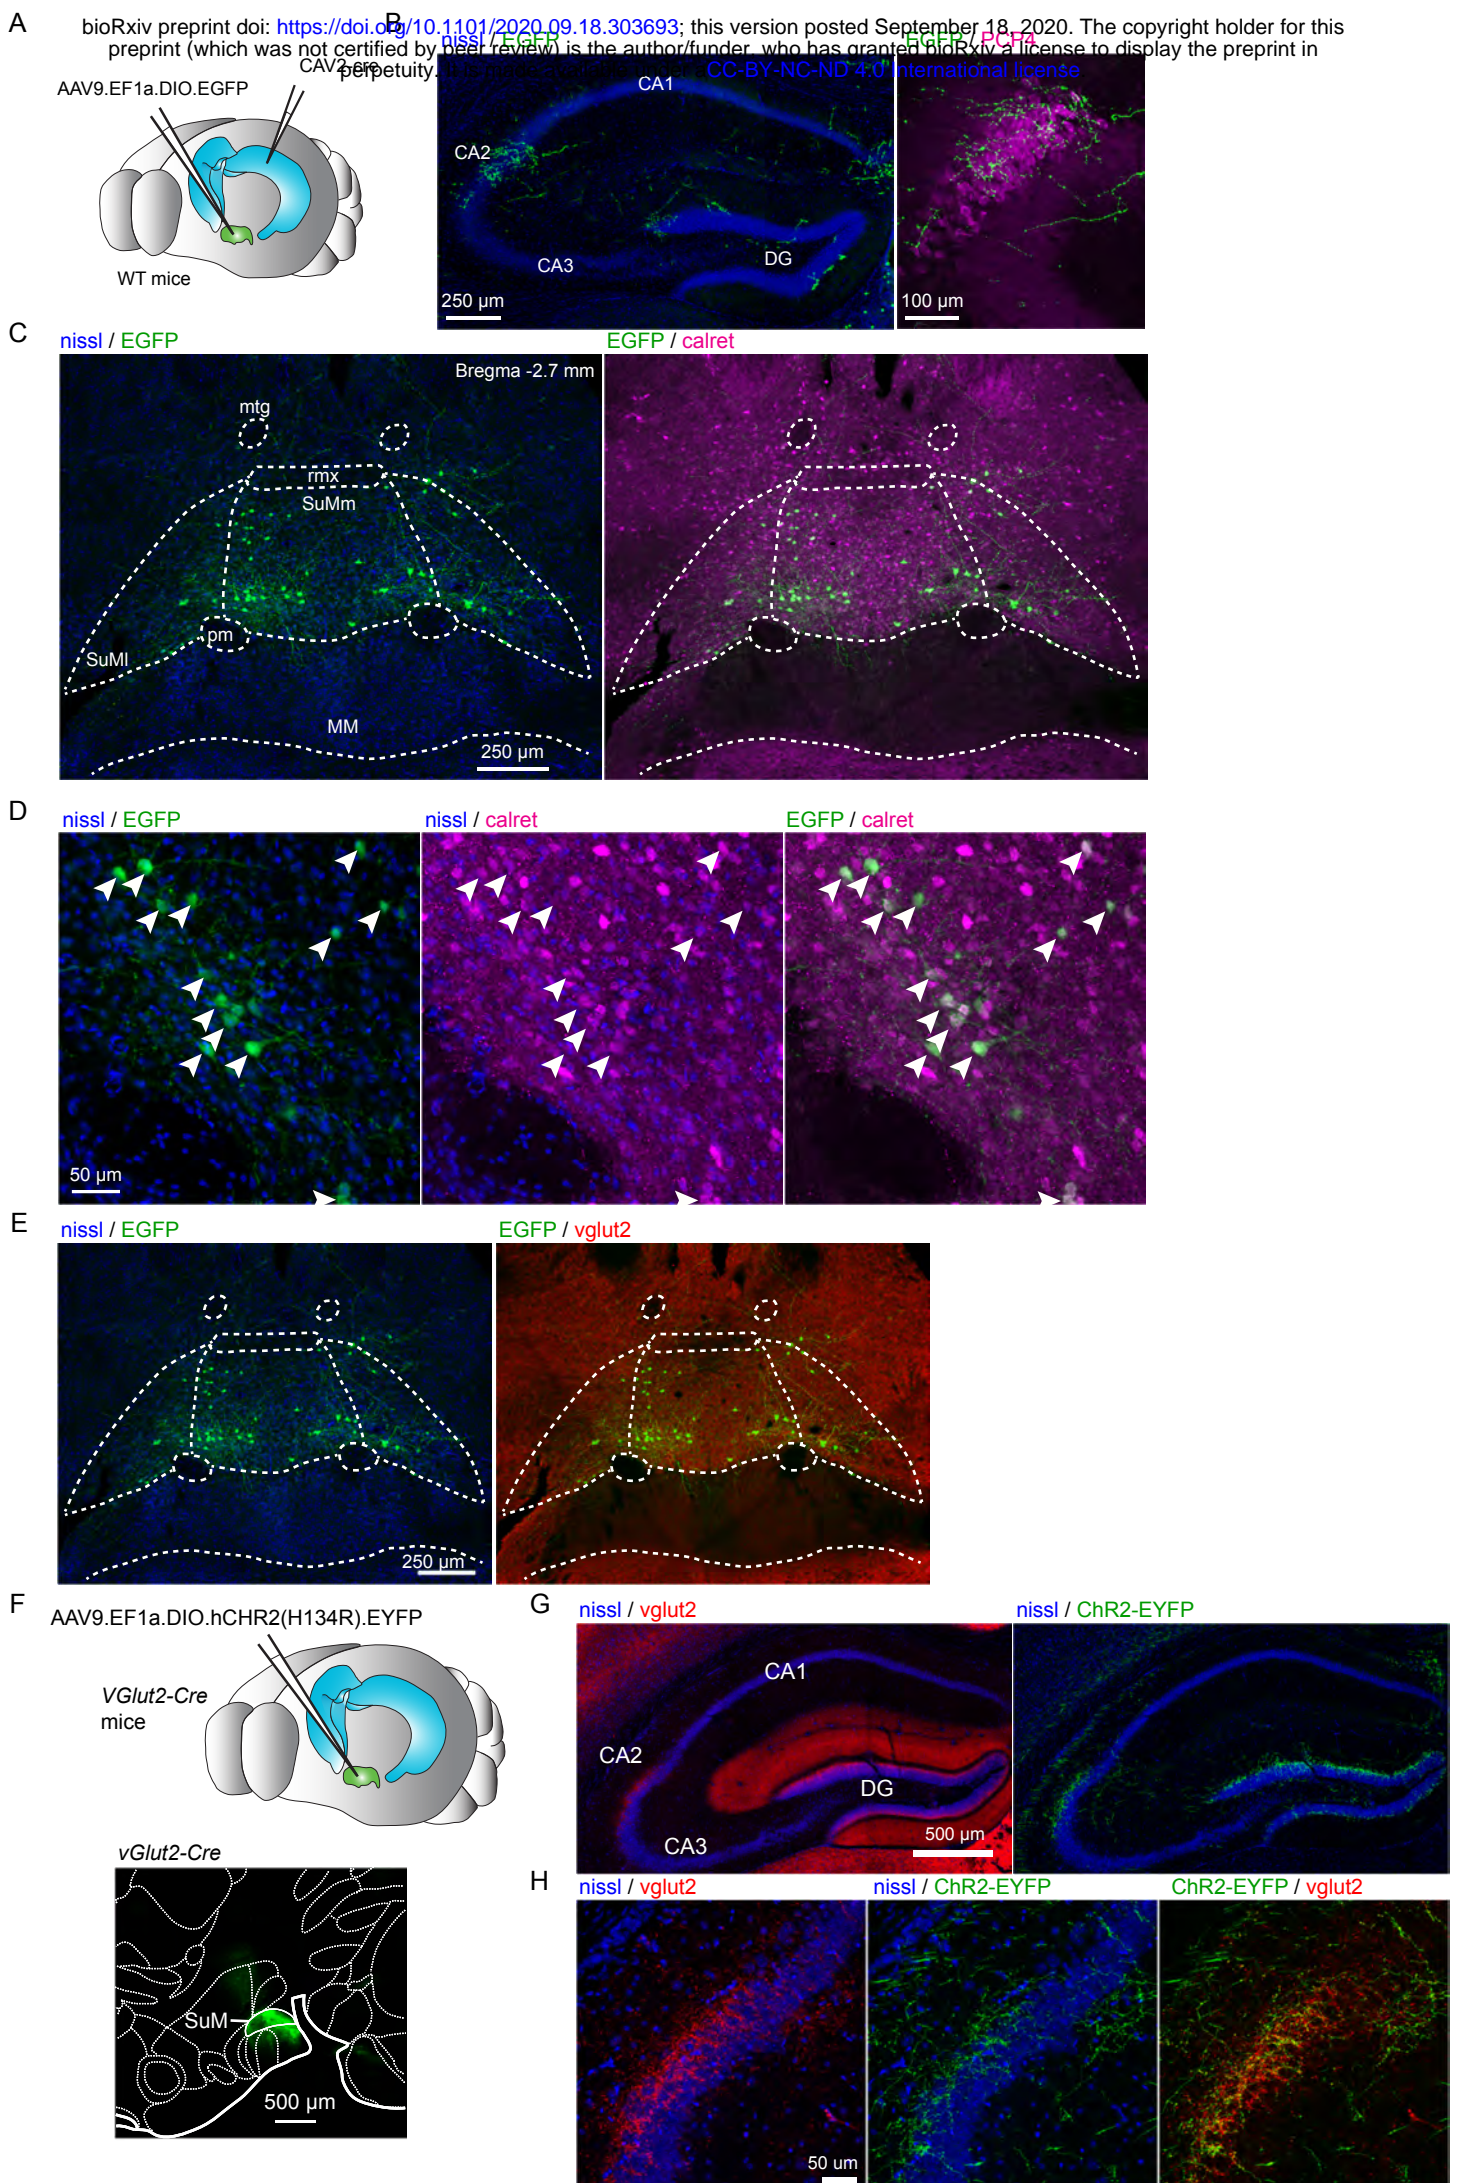

Supplemental Figure 1.

A

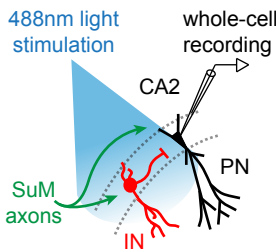

B

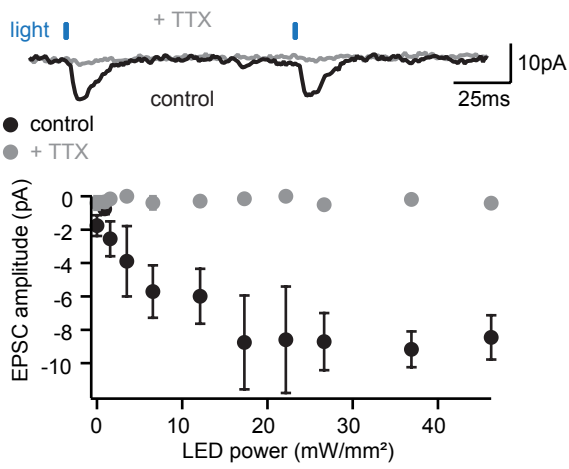

C

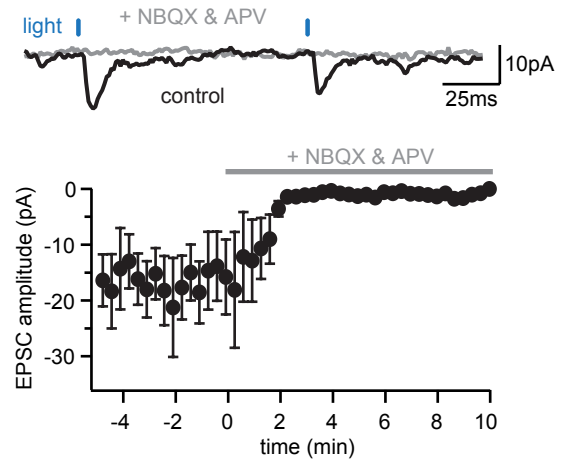

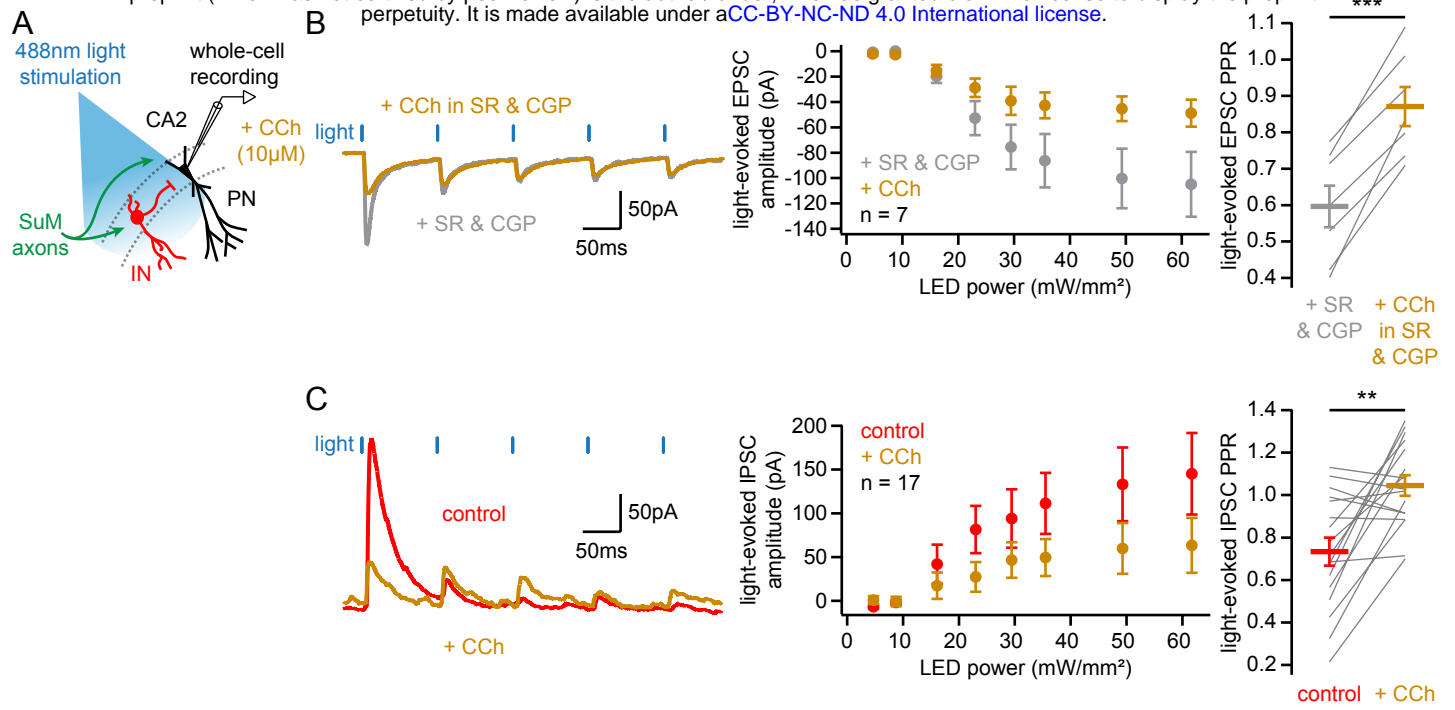

Source: http://biorxiv.org/content/10.1101/2020.09.18.303693v1.full.pdf
